# Supplementary material for: Cross-conjugated isothianaphthene quinoids: a versatile strategy for controlling electronic structures
Source: Royal Society of Chemistry journal article supplement (doi:10.1039/d1tc05794d), 2022-01-01

## Electronic Supplementary Information

### Cross-conjugated isothianaphthene quinoids: a versatile strategy for controlling electronic structures

Keitaro Yamamoto,<sup>a,b</sup> Sergio Moles Quintero,<sup>c</sup> Seihou Jinnai,<sup>a</sup> Eunjeong Jeong,<sup>d</sup> Kyohei Matsuo,<sup>d</sup> Mitsuharu Suzuki,<sup>e</sup> Hiroko Yamada,<sup>d</sup> Juan Casado,<sup>\*,c</sup> and Yutaka Ie<sup>\*,a,f</sup>

<sup>a</sup>*The Institute of Scientific and Industrial Research (SANKEN), Osaka University, 8-1 Mihogaoka, Ibaraki, Osaka 567-0047, Japan*

<sup>b</sup>*Tokyo Metropolitan Industrial Technology Research Institute, 2-4-10 Aomi, Koto-ku, Tokyo 135-0064, Japan*

<sup>c</sup>*Department of Physical Chemistry, University of Malaga, Campus de Teatinos s/n 29071 Malaga, Spain*

<sup>d</sup>*Division of Materials Science, Nara Institute of Science and Technology (NAIST), 8916-5 Takayama-cho, Ikoma, Nara 630-0192, Japan*

<sup>e</sup>*Division of Applied Chemistry, Graduate School of Engineering, Osaka University, 2-1 Yamadaoka, Suita, Osaka 565-0871, Japan*

<sup>f</sup>*Innovative Catalysis Science Division, Institute for Open and Transdisciplinary Research Initiatives (OTRI), Osaka University, 2-1 Yamadaoka, Suita, Osaka 565-0871, Japan*

### Table of Contents

|                                                           |                |
|-----------------------------------------------------------|----------------|
| <b>General information</b>                                | <b>S2</b>      |
| <b>Supplementary figures</b>                              | <b>S3-S6</b>   |
| <b>Synthesis</b>                                          | <b>S7-S13</b>  |
| <b>OFET and NIR OPT device fabrication and evaluation</b> | <b>S14</b>     |
| <b>Computational details</b>                              | <b>S14-S20</b> |
| <b>References</b>                                         | <b>S20</b>     |
| <b><sup>1</sup>H NMR spectra</b>                          | <b>S21-S23</b> |

## General information

Column chromatography was performed on silica gel. KANTO Chemical silica gel 60N (40–50  $\mu\text{m}$ ). Thin-layer Chromatography (TLC) plates were visualized with UV light. Preparative gel-permeation chromatography (GPC) was performed on a Japan Analytical LC-918 equipped with JAI-GEL 1H/2H.  $^1\text{H}$  and  $^{13}\text{C}$  NMR spectra were recorded on a JEOL JNM-ECS400 or JEOL JNM-ECA600 spectrometer in  $\text{CDCl}_3$  with tetramethylsilane (TMS) as an internal standard. Data are reported as follows: chemical shift in ppm ( $\delta$ ), multiplicity (s = singlet, d = doublet, t = triplet, m = multiplet, br = broad), coupling constant (Hz), and integration. UV-vis-NIR spectra were recorded on a Shimadzu UV-3600 spectrophotometer. All spectra were obtained in spectrograde solvents. Photoelectron spectroscopy in air (PESA) was carried out using a Riken Keiki Co. Ltd. AC-3 with a light intensity of 20 mW. High-resolution mass spectrum (HRMS) was obtained atmospheric pressure chemical ionization (APCI) method using a Thermo scientific LTQ Orbitrap XL. The surface structures of the deposited organic film were observed by atomic force microscopy (Shimadzu, SPM9600), and the film crystallinity was evaluated by an X-ray diffractometer (Rigaku, SmartLab). X-ray diffraction patterns were obtained using Bragg-Brentano geometry with  $\text{CuK}\alpha$  radiation as an X-ray source with an acceleration voltage of 45 kV and a beam current of 200 mA. The scanning mode was set to  $2\theta$ - $\theta$  scans between  $2^\circ$ – $30^\circ$  with scanning steps of  $0.01^\circ$ .

Electrochemical experiments have been conducted in dichloromethane or 1,1,2,2-tetrachloroethane at room temperature by using 0.1 M tetrabutyl ammonium hexafluorophosphate ( $\text{Bu}_4\text{NPF}_6$ ) as the supporting electrolyte. DPV measurement was carried out on a BAS CV-620C voltammetric analyzer using a platinum disk as the working electrode, platinum wire as the counter electrode, and  $\text{Ag}/\text{AgNO}_3$  as the reference electrode at a scan rate of  $100 \text{ mV s}^{-1}$ . In situ UV-Vis-NIR spectroelectrochemical studies were conducted on the the Varian Cary 5000 UV-Vis-NIR Spectrophotometer, respectively. A C3 epsilon potentiostat from BASi was used for the electrolysis using a thin layer cell from a demountable omni cell from Specac. In this cell, a three electrodes system was coupled to conduct in situ spectroelectrochemistry. A Pt gauze was used as the working electrode, a Pt wire was used as the counter electrode, and an Ag wire was used as the pseudo-reference electrode. The spectra were collected a constant potential electrolysis and the potentials were changed in interval of 15 mV. The electrochemical medium used was 0.1 M  $\text{Bu}_4\text{NPF}_6$  in fresh distilled dichloromethane, at room temperature with sample concentrations of  $10^{-3} \text{ M}$ .

The 1064 nm FT-Raman spectra were obtained with an FT-Raman accessory kit (FRA/106-S) of a Bruker Equinox 55 FT-IR interferometer. A continuous-wave Nd-YAG laser working at 1064 nm was employed for excitation. A germanium detector operating at liquid nitrogen temperature was used. Raman scattering radiation was collected in a back-scattering configuration with a standard spectral resolution of  $4 \text{ cm}^{-1}$ . For these measurements, 1000–3000 scans were averaged for each spectrum.

## Supplementary figures

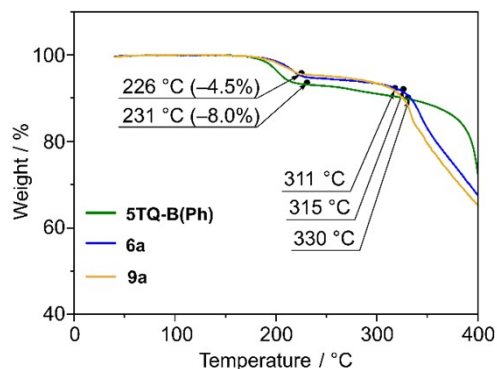

**Fig. S1** TGA curves for **5TQ-B(Ph)**, **6a**, and **9a** with a heating rate of  $10\text{ °C min}^{-1}$  in  $\text{N}_2$ .

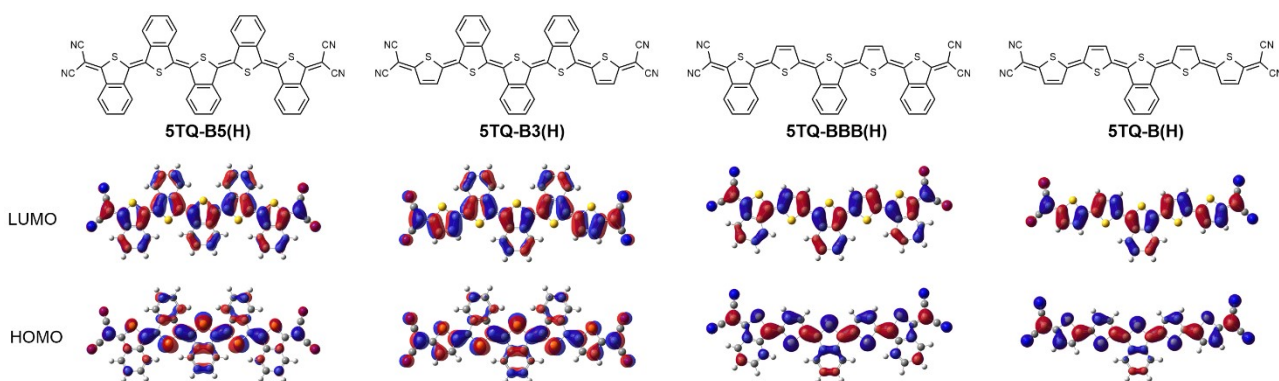

**Fig. S2** Calculated HOMOs and LUMOs of **5TQ-B5(H)**, **5TQ-B3(H)**, **5TQ-BBB(H)**, and **5TQ-B(H)**.

**Table S1.** NICS(1.7)zz values calculated at the B3LYP/6-31G(d,p) level of theory by using the Gaussian09.

| Ring      | <b>5TQ-B5(H)</b> | <b>5TQ-B3(H)</b> | <b>5TQ-BBB(H)</b> | <b>5TQ-B(H)</b> |
|-----------|------------------|------------------|-------------------|-----------------|
| <b>A1</b> | -17.9349         | -17.0315         | -15.6762          | -13.7215        |
| <b>A2</b> | -16.9591         | -19.1305         | -                 | -               |
| <b>A3</b> | -18.5761         | -                | -17.1780          | -               |
| <b>B</b>  | -6.5389          | -5.5824          | -7.1950           | -12.9392        |
| <b>C</b>  | -6.4646          | -7.0087          | -8.2827           | -10.5878        |
| <b>D</b>  | -7.8669          | -7.7546          | -8.3854           | -8.0972         |

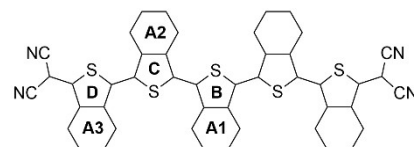

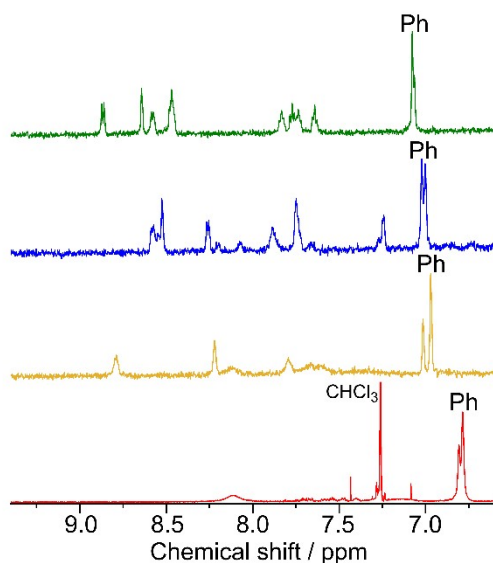

**Fig. S3**  $^1\text{H}$  NMR spectra of **5TQ-B5(Ph)** (green), **5TQ-B3(Ph)** (blue), and **5TQ-BBB(Ph)** (yellow) in 1,1,2,2-tetrachloroethane- $d_2$  at 130 °C, and **5TQ-B(Ph)** (red) in  $\text{CDCl}_3$  at 25 °C in the aromatic regions. Several minor peaks in the spectrum of **5TQ-B3(Ph)** are attributed to *syn*-, *anti*-isomers.

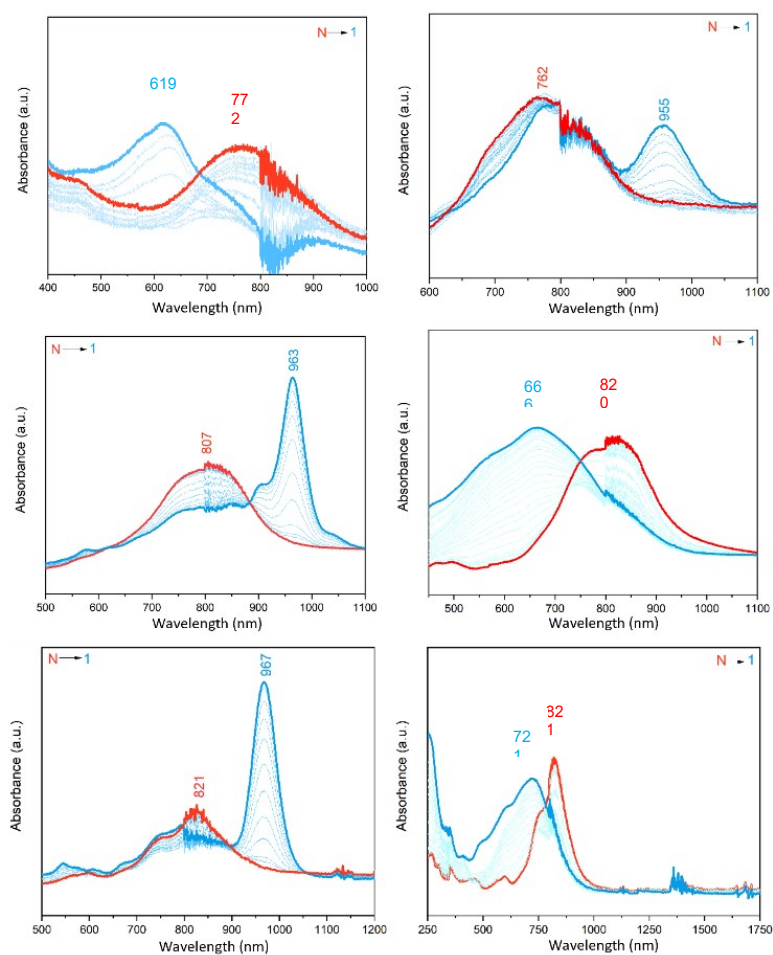

**Fig. S4** From the bottom: **5TQ-BBB(Ph)**, **5TQ-B3(Ph)**, **5TQ-B5(Ph)**. UV-Vis-NIR spectroelectrochemical reduction/oxidation (right/left) processes in 0.1 M  $\text{TBAPF}_6$  in dichloromethane at room temperature. Red lines correspond to the spectra of neutral species, blue lines correspond to the reduced/oxidized species. Dashed light color lines correspond to the intermediate spectra between the former species.

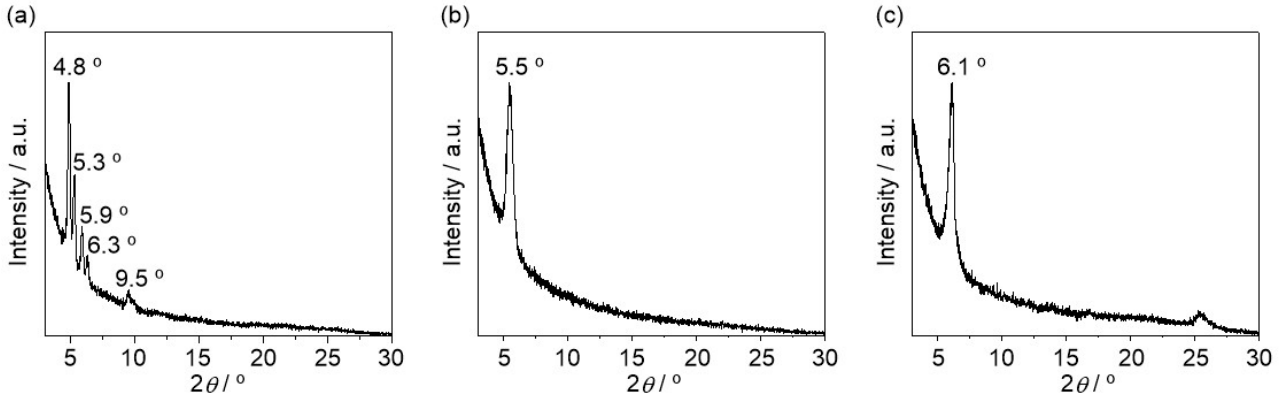

**Fig. S5** XRD profiles of (a) 5TQ-B5(EH), (b) 5TQ-B3(EH), and (c) 5TQ-BBB(EH) in thin films.

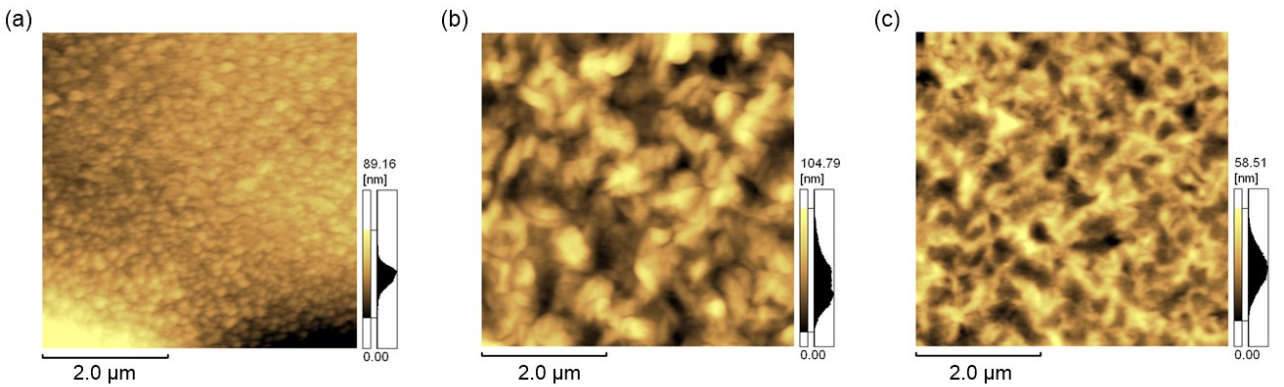

**Fig. S6** AFM height images of (a) 5TQ-B5(EH), (b) 5TQ-B3(EH), and (c) 5TQ-BBB(EH) in thin films.

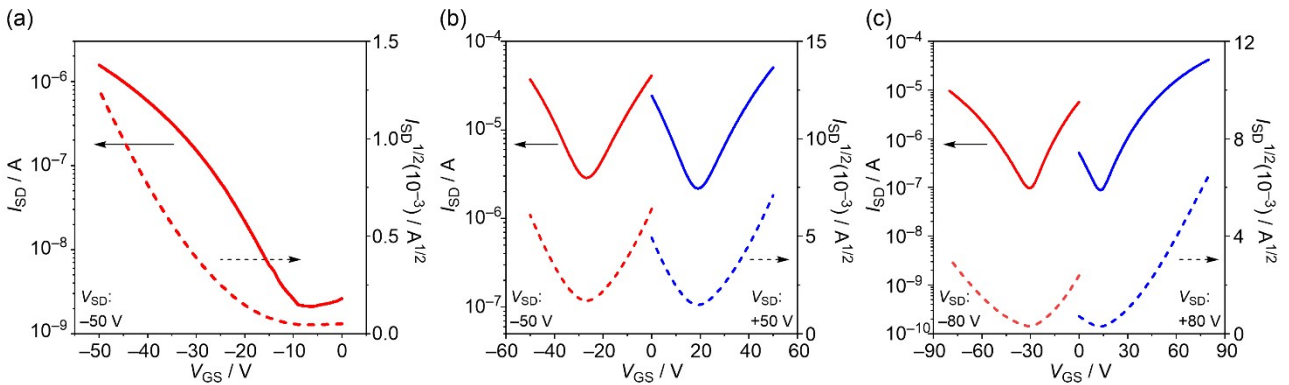

**Fig. S7** Transfer characteristics of the OFETs based on (a) 5TQ-B5(EH), (b) 5TQ-B3(EH), and (c) 5TQ-BBB(EH).

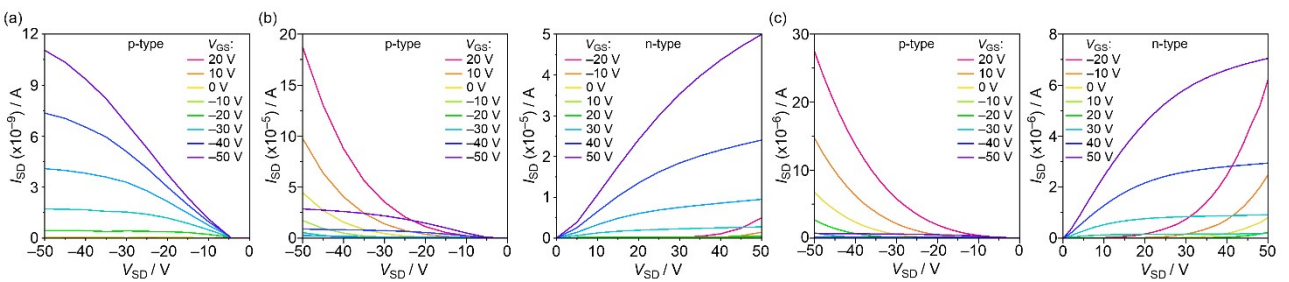

**Fig. S8** Output characteristics of the OFETs based on (a) 5TQ-B5(EH), (b) 5TQ-B3(EH), and (c) 5TQ-BBB(EH).

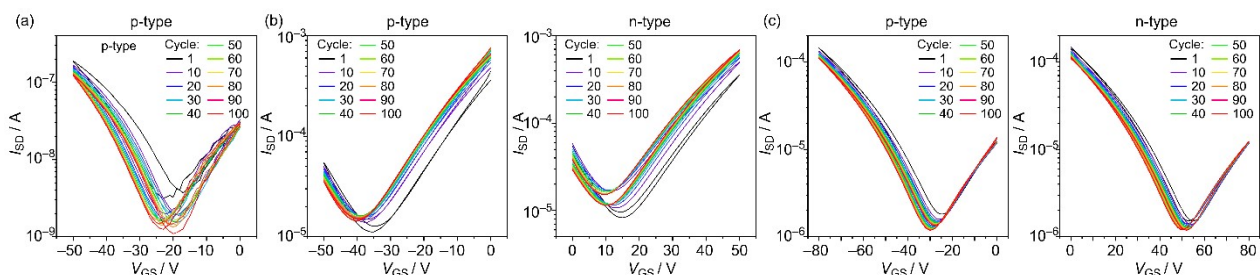

**Fig. S9** Transfer characteristics of OFETs based on (a) **5TQ-B5(EH)**, (b) **5TQ-B3(EH)**, and (c) **5TQ-BBB(EH)** with repeated biases up to 100 cycles.

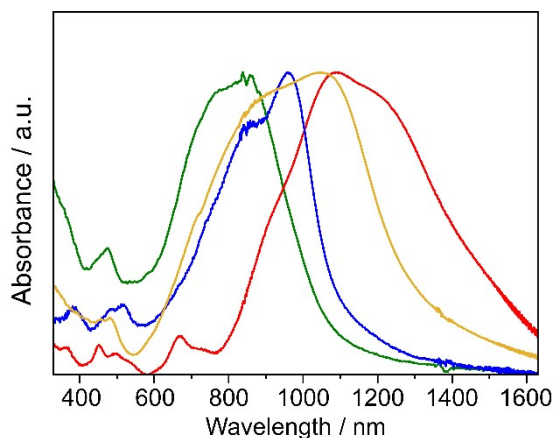

**Fig. S10** UV-vis-NIR absorption spectra of **5TQ-B5(EH)** (green), **5TQ-B3(EH)** (blue), **5TQ-BBB(EH)** (yellow), and **5TQ-B(EH)** (red) in thin films.

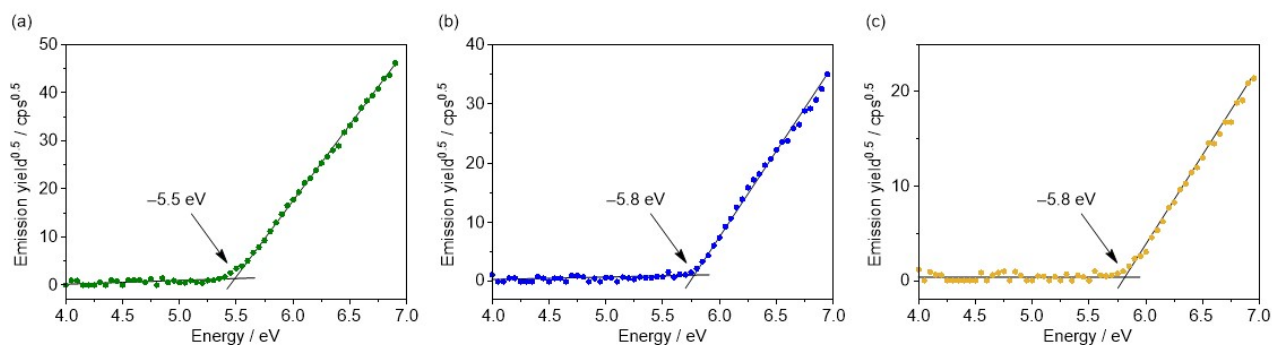

**Fig. S11** PESA spectra of (a) **5TQ-B5(EH)**, (b) **5TQ-B3(EH)**, and (c) **5TQ-BBB(EH)** in thin films.

**Table S2.** Properties of the molecules in thin films.

| Compounds          | $\lambda_{\max}$<br>/nm | $\Delta E_{\text{g}}^{\text{opt}}$<br>/eV | $I_P$<br>/eV <sup>a</sup> |
|--------------------|-------------------------|-------------------------------------------|---------------------------|
| <b>5TQ-B5(EH)</b>  | 840                     | 1.16                                      | -5.5                      |
| <b>5TQ-B3(EH)</b>  | 959                     | 1.13                                      | -5.8                      |
| <b>5TQ-BBB(EH)</b> | 1043                    | 0.94                                      | -5.8                      |

<sup>a</sup> Determined by PESA measurements.

## Materials

Unless stated otherwise, all reagents were purchased from commercial sources and used without purification. Compounds **1b**, **2**, **7b**, **S1**, **S2**, and **S7** were prepared by the reference procedures.<sup>1-3</sup>

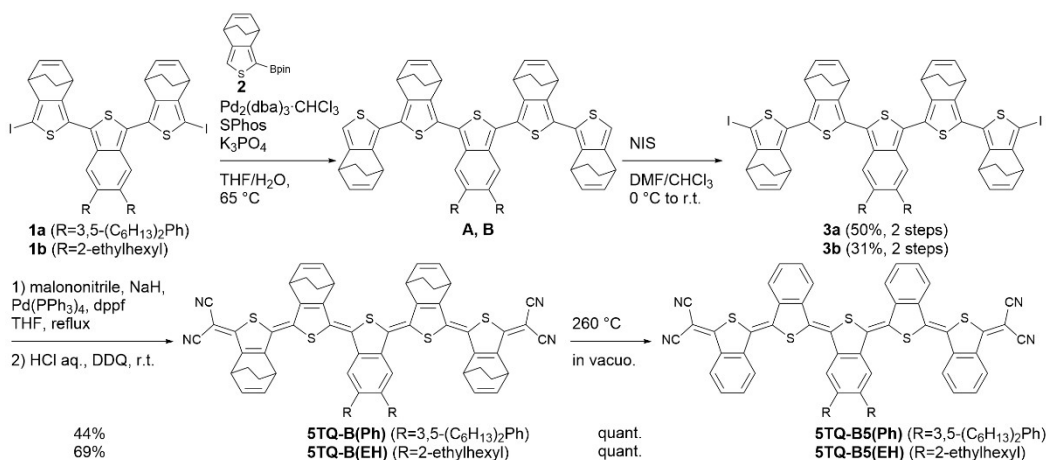

**Scheme S1.** Synthetic route of **5TQ-B(Ph)**, **5TQ-B(EH)**, **5TQ-B5(Ph)**, and **5TQ-B5(EH)**.

**Synthesis of 3a:** **1a** (110 mg, 0.092 mmol), **2** (80 mg, 0.28 mmol), Pd<sub>2</sub>(dba)<sub>3</sub>·CHCl<sub>3</sub> (9.5 mg, 0.0092 mmol), SPhos (15 mg, 0.037 mmol), and K<sub>3</sub>PO<sub>4</sub> (78 mg, 0.37 mmol) were placed in a reaction vial and dissolved in THF (1.4 mL)/H<sub>2</sub>O (0.23 mL). The reaction vial was purged with nitrogen and allowed to warm to 65 °C. After stirring for 2 h, the reaction mixture was extracted with EtOAc, washed with water, and the organic layer was dried using MgSO<sub>4</sub>. The extraction was passed through pad of celite and the solvent was removed under reduced pressure, followed by purification with preparative GPC (CHCl<sub>3</sub>) to give the intermediate **A** (77 mg, 66%) as a dark red solid. <sup>1</sup>H NMR (600 MHz, CDCl<sub>3</sub>, TMS): δ 7.84 (d, *J* = 8.2 Hz, 2H), 6.79 (s, 4H), 6.77 (s, 2H), 6.75 (s, 2H), 6.64-6.53 (m, 8H), 4.27-4.25 (m, 2H), 4.19-4.16 (m, 4H), 3.89-3.86 (m, 2H), 2.49 (t, *J* = 7.6 Hz, 8H), 1.84-1.63 (m, 16H), 1.42-1.37 (m, 8H), 1.29-1.23 (m, 24H), 0.88 (t, *J* = 6.9 Hz, 12H); <sup>13</sup>C NMR (150 MHz, CDCl<sub>3</sub>, TMS): δ 147.6, 145.3, 144.6, 144.6, 143.8, 143.8, 142.1, 141.3, 139.1, 135.8, 135.7, 135.6, 135.5, 135.4, 135.4, 135.3, 127.2, 126.7, 125.6, 124.1, 124.0, 122.5, 122.5, 122.3, 121.8, 112.3, 36.9, 36.3, 35.9, 35.8, 35.7, 31.8, 31.6, 29.0, 26.2, 26.1, 26.0, 25.9, 22.6, 14.2; HRMS (APCI) *m/z*: [M+H]<sup>+</sup> calcd. for C<sub>84</sub>H<sub>94</sub>S<sub>5</sub>, 1263.6032; found, 1263.6034.

NIS (29 mg, 0.13 mmol) was added to a solution of intermediate **A** (77 mg, 0.061 mmol) in DMF (6.4 mL) and CHCl<sub>3</sub> (0.6 mL) at 0 °C. Then, this reaction was allowed to warm to room temperature. After stirring overnight, the reaction was quenched by addition of Na<sub>2</sub>SO<sub>3</sub> aq.. The combined organic was extracted with EtOAc and washed with water. After drying with MgSO<sub>4</sub>, the solvent was removed under reduced pressure and purified by column chromatography on silica gel (hexane:CH<sub>2</sub>Cl<sub>2</sub> = 10:1) to give **3a** (70 mg, 50%, 2 steps) as a dark red solid. <sup>1</sup>H NMR (600 MHz, CDCl<sub>3</sub>, TMS): δ 7.82 (s, 2H), 6.78 (s, 4H), 6.77 (s, 2H), 6.62-6.52 (m, 8H), 4.25-4.14 (m, 6H), 3.76 (s, 2H), 2.42 (t, *J* = 6.2 Hz, 8H), 1.80-1.61 (m, 16H), 1.42-1.37 (m, 8H), 1.27-1.24 (m, 24H), 0.90-0.86 (m, 12H); <sup>13</sup>C NMR (100 MHz, CDCl<sub>3</sub>, TMS): δ 152.6, 145.2, 145.1, 145.0, 144.0, 143.9, 142.0, 141.1, 139.1, 135.5, 135.5, 135.4, 135.3, 135.2, 127.6, 127.1, 126.7, 125.3, 122.7, 122.1, 62.9, 37.9, 36.1, 35.8, 31.7, 31.5, 31.5, 28.9, 25.8, 25.5, 25.3, 22.5, 14.0; HRMS (APCI) *m/z*: [M+H]<sup>+</sup> calcd. for C<sub>84</sub>H<sub>92</sub>I<sub>2</sub>S<sub>5</sub>, 1515.3965; found, 1515.3973.

**Synthesis of 3b:** **1b** (180 mg, 0.19 mmol), **2** (120 mg, 0.43 mmol), Pd<sub>2</sub>(dba)<sub>3</sub>·CHCl<sub>3</sub> (20 mg, 0.019 mmol), SPhos (32 mg, 0.077 mmol), and K<sub>3</sub>PO<sub>4</sub> (160 mg, 0.77 mmol) were placed in a reaction vial and dissolved in THF (2.6 mL)/H<sub>2</sub>O (0.40 mL). The reaction vial was purged with nitrogen and allowed to warm to 65 °C. After stirring for 3 h, the reaction mixture was extracted with EtOAc, washed with water, and the organic layer was dried using MgSO<sub>4</sub>. The extraction was passed through pad of celite and the solvent was removed under reduced pressure, followed by purification with preparative GPC (CHCl<sub>3</sub>) to give the intermediate **B** (160 mg, 83%) as a dark red solid. <sup>1</sup>H NMR (400 MHz, CDCl<sub>3</sub>, TMS): δ 7.55 (s, 2H), 6.76 (s, 2H), 6.60-6.54 (m, 8H), 4.21 (s, 6H), 3.88 (s, 2H), 2.59-2.55 (m, 4H), 1.77-1.63 (m, 18H), 1.42-1.29 (m, 16H), 0.93-0.86 (m, 12H); <sup>13</sup>C NMR (150 MHz, CDCl<sub>3</sub>, TMS): δ 147.6, 144.8, 144.5, 144.4, 143.7, 143.6, 137.8, 135.7, 135.7, 135.6, 135.5, 135.4, 135.4, 135.3, 135.2, 123.7, 123.6, 122.7, 122.6, 122.2, 121.3, 112.2, 40.1, 40.0, 37.8, 36.9, 36.2, 36.0, 35.9, 35.8, 35.7, 32.6, 32.5, 29.0, 28.9, 26.2, 26.1, 26.0, 26.0, 26.0, 25.6, 23.2, 14.2, 14.2, 11.0, 10.9; HRMS (APCI) *m/z*: [M+H]<sup>+</sup> calcd. for C<sub>64</sub>H<sub>70</sub>S<sub>5</sub>, 999.4154; found, 999.4147.

NIS (76 mg, 0.34 mmol) was added to a solution of intermediate **B** (160 mg, 0.16 mmol) in DMF (17 mL) and



CHCl<sub>3</sub> (1.6 mL) at 0 °C. Then, this reaction was allowed to warm to room temperature. After stirring overnight, the reaction was quenched by addition of Na<sub>2</sub>SO<sub>3</sub> aq.. The combined organic was extracted with EtOAc and washed with water. After drying with MgSO<sub>4</sub>, the extraction was passed through pad of celite and the solvent was removed under reduced pressure, followed by purification with preparative GPC (CHCl<sub>3</sub>) to give the intermediate **3b** (75 mg, 31%, 2 steps) as a dark red solid. <sup>1</sup>H NMR (400 MHz, CDCl<sub>3</sub>, TMS): δ 7.53 (s, 2H), 6.60-6.53 (m, 8H), 4.25-4.10 (m, 6H), 3.78-3.75 (m, 2H), 2.59-2.56 (m, 4H), 1.73-1.61 (m, 18H), 1.41-1.26 (m, 16H), 0.93-0.84 (m, 12H); <sup>13</sup>C NMR (150 MHz, CDCl<sub>3</sub>, TMS): δ 152.7, 145.2, 145.1, 144.8, 144.0, 143.9, 138.0, 135.6, 135.4, 135.3, 127.9, 127.9, 123.6, 122.6, 122.4, 122.4, 121.2, 62.9, 40.1, 38.1, 37.8, 36.2, 36.0, 35.9, 32.6, 32.5, 29.0, 28.9, 25.9, 25.6, 25.5, 25.4, 23.2, 14.2, 11.0, 10.9; HRMS (APCI) *m/z*: [M+H]<sup>+</sup> calcd. for C<sub>64</sub>H<sub>68</sub>I<sub>2</sub>S<sub>5</sub>, 1251.2087; found, 1251.2076.

*Synthesis of 5TQ-B(Ph)*: Sodium hydride (60% in oil) (7.5 mg, 0.18 mmol) was added to a suspension of malononitrile (6.2 mg, 0.093 mmol) in anhydrous THF (1.3 mL) under nitrogen atmosphere and stirred for 10 min at room temperature. This mixture was added to a mixture of **3a** (30 mg, 0.020 mmol), Pd(PPh<sub>3</sub>)<sub>4</sub> (2.3 mg, 0.0020 mmol), and 1,1'-bis(diphenylphosphino)ferrocene (dppf) (2.2 mg, 0.0040 mmol) in a reaction vial. The reaction vial was purged with nitrogen and allowed to warm to 75 °C. After stirring for 40 min, the reaction was cooled to 0 °C and diluted hydrochloric acid (1 M, 0.8 mL). The combined organic was extracted with CHCl<sub>3</sub>, washed with water, and the organic layer was dried using MgSO<sub>4</sub>. The organic solvent was removed under reduced pressure. Then the resultant precipitate was dissolved in CH<sub>2</sub>Cl<sub>2</sub> and the oxidation reaction was conducted by adding DDQ. After confirming the disappearance of intermediate by TLC, the organic solvent was removed under reduced pressure. The resultant precipitate was washed with acetone and purified by column chromatography on silica gel (CH<sub>2</sub>Cl<sub>2</sub>) to give **5TQ-B(Ph)** (12 mg, 44%) as a green solid. <sup>1</sup>H NMR (600 MHz, CDCl<sub>3</sub>, TMS): δ 8.00-8.18 (br), 6.81 (s, 2H), 6.79 (s, 4H), 2.45 (t, *J* = 8.3 Hz, 8H), 1.45-1.35 (m, 8H), 1.20-1.31 (m, 24H), 0.92-0.85 (m, 12H); HRMS (APCI) *m/z*: [M+H]<sup>+</sup> calcd. for C<sub>90</sub>H<sub>92</sub>N<sub>4</sub>S<sub>5</sub>, 1389.5999; found, 1389.6005.

*Synthesis of 5TQ-B(EH)*: Compound **5TQ-B(EH)** was synthesized from **3b** (73 mg, 0.058 mmol) with a yield of 69% by following the procedure used for the preparation of **5TQ-B(Ph)**. Green solid; <sup>1</sup>H NMR (600 MHz, CDCl<sub>3</sub>, TMS): δ 8.05-7.95 (br), 6.90-6.70 (br), 5.20-4.70 (br), 3.15-2.80 (br), 1.82-1.72 (br), 1.50-1.25 (m, 18H), 0.98 (t, *J* = 7.6 Hz, 6H), 0.90-0.86 (m, 6H); HRMS (APCI) *m/z*: [M+H]<sup>+</sup> calcd. for C<sub>70</sub>H<sub>68</sub>N<sub>4</sub>S<sub>5</sub>, 1125.4121; found, 1125.4115.

*Synthesis of 5TQ-B5(Ph)*: **5TQ-B(Ph)** (12 mg, 0.0086 mmol) was placed in a Kugelrohr setup and allowed to heated at 260 °C for 20 min under vacuum condition to give **5TQ-B5(Ph)** as a blue solid, quantitatively. <sup>1</sup>H NMR (600 MHz, 130 °C, 1,1,2,2-tetrachloroethane-*d*<sub>2</sub>): δ 8.87 (d, *J* = 8.3 Hz, 2H), 8.64 (s, 2H), 8.60-8.55 (m, 2H), 8.49-8.44 (m, 4H), 7.85-7.81 (m, 2H), 7.79-7.71 (m, 4H), 7.66-7.62 (m, 2H), 7.08 (s, 4H), 7.07 (s, 2H), 2.67 (t, *J* = 8.2 Hz, 8H), 1.63 (t, *J* = 6.5 Hz, 8H), 1.43-1.35 (m, 24H), 0.97 (t, *J* = 6.9 Hz, 12H). <sup>13</sup>C NMR spectrum of this compound was not observed due to the limited solubility. HRMS (APCI) *m/z*: [M+H]<sup>+</sup> calcd. for C<sub>82</sub>H<sub>76</sub>N<sub>4</sub>S<sub>5</sub>, 1277.4747; found, 1277.4747.

*Synthesis of 5TQ-B5(EH)*: Compound **5TQ-B5(EH)** was synthesized from **5TQ-B(EH)** (19 mg, 0.017 mmol) quantitatively, by following the procedure used for the preparation of **5TQ-B5(Ph)**. Blue solid; <sup>1</sup>H NMR (600 MHz, 130 °C, 1,1,2,2-tetrachloroethane-*d*<sub>2</sub>): δ 8.89 (d, *J* = 7.6 Hz, 2H), 8.59-8.57 (m, 4H), 8.50 (d, *J* = 7.6 Hz, 2H), 8.42 (s, 2H), 7.90-7.82 (m, 8H), 7.74 (t, *J* = 8.3 Hz, 2H), 7.68 (t, *J* = 8.3 Hz, 2H), 3.00-2.90 (m, 4H), 2.06-2.00 (m, 2H), 1.71-1.45 (m, 16H), 1.14 (t, *J* = 7.6 Hz, 6H), 0.96 (t, *J* = 7.6 Hz, 6H); HRMS (APCI) *m/z*: [M+H]<sup>+</sup> calcd. for C<sub>62</sub>H<sub>52</sub>N<sub>4</sub>S<sub>5</sub>, 1013.2869; found, 1013.2869.



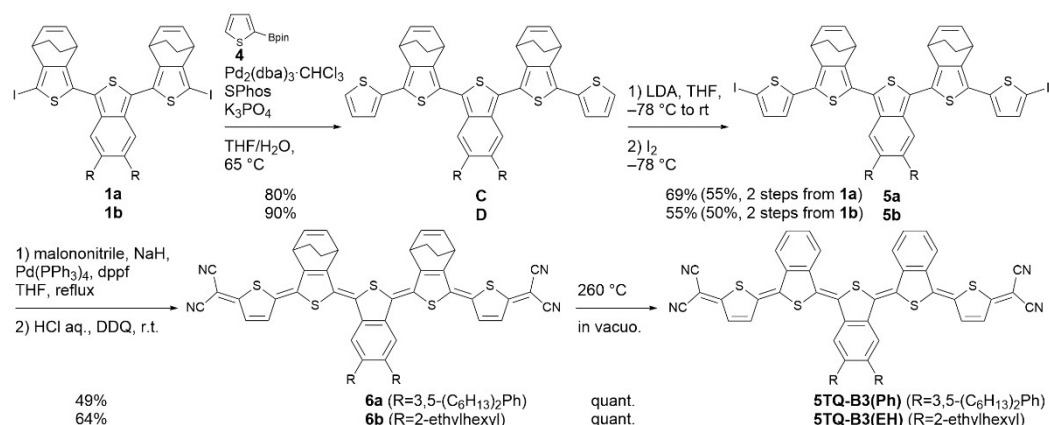

**Scheme S2.** Synthetic route of **5TQ-B3(Ph)** and **5TQ-B3(EH)**.

**Synthesis of the intermediate C:** **1a** (91 mg, 0.076 mmol), thiophene-2-boronic acid pinacol ester (**4**) (48 mg, 0.23 mmol), Pd<sub>2</sub>(dba)<sub>3</sub>·CHCl<sub>3</sub> (7.9 mg, 0.0076 mmol), SPhos (13 mg, 0.030 mmol), and K<sub>3</sub>PO<sub>4</sub> (65 mg, 0.30 mmol) were placed in a reaction vial and dissolved in THF (1.2 mL)/H<sub>2</sub>O (0.2 mL). The reaction vial was purged with nitrogen and allowed to warm to 65 °C. After stirring for 2 h, the reaction mixture was extracted with EtOAc, washed with water, and the organic layer was dried using MgSO<sub>4</sub>. The extraction was passed through pad of celite and the solvent was removed under reduced pressure, followed by purification with preparative GPC (CHCl<sub>3</sub>) to give the intermediate **C** (67 mg, 80%) as a dark red solid. <sup>1</sup>H NMR (400 MHz, CDCl<sub>3</sub>, TMS): δ 7.84 (s, 2H), 7.29 (dd, *J* = 5.0, 0.9 Hz, 2H), 7.17 (dd, *J* = 3.7, 0.9 Hz, 2H), 7.06 (dd, *J* = 5.0, 3.7 Hz, 2H), 6.78 (s, 6H), 6.61-6.58 (m, 4H), 2.43 (t, *J* = 7.8 Hz, 8H), 1.80-1.20 (m, 40H), 0.88 (t, *J* = 6.9 Hz, 12H); <sup>13</sup>C NMR (100 MHz, CDCl<sub>3</sub>, TMS): δ 145.8, 143.7, 142.1, 141.2, 139.2, 135.8, 135.6, 135.3, 135.3, 127.6, 127.2, 126.8, 125.5, 125.3, 125.1, 124.7, 122.1, 121.0, 36.2, 35.9, 35.9, 31.8, 31.6, 29.0, 25.8, 22.6, 14.2; HRMS (APCI) *m/z*: [M+H]<sup>+</sup> calcd. for C<sub>72</sub>H<sub>82</sub>S<sub>5</sub>, 1107.5093; found, 1107.5107.

**Synthesis of 5a:** The intermediate **C** (42 mg, 0.031 mmol) was placed in a two-necked-bottomed flask, which was filled with N<sub>2</sub>, and dissolved in THF (3.5 mL). 1 M LDA (0.16 mL) was added slowly to a solution of **S1a** at -78 °C and allowed to warm to 0 °C, then cooled to -78 °C. A solution of I<sub>2</sub> (39 mg, 0.16 mmol) in THF 0.5 mL was added to the two-necked-bottomed flask and stirred 10 min at -78 °C. Then, the reaction was quenched by addition of Na<sub>2</sub>SO<sub>3</sub> aq.. The reaction mixture was extracted with EtOAc, washed with water, and the organic layer was dried using MgSO<sub>4</sub>. The extraction was passed through pad of celite and the solvent was removed under reduced pressure, followed by purification with preparative GPC (CHCl<sub>3</sub>) to give **5a** (29 mg, 69%) as a dark red solid. <sup>1</sup>H NMR (400 MHz, CDCl<sub>3</sub>, TMS): δ 7.81 (s, 2H), 7.20 (d, *J* = 4.1 Hz, 2H), 6.84-6.82 (m, 2H), 6.78-6.76 (m, 8H), 6.63-6.56 (m, 4H), 4.32-4.23 (m, 4H), 2.42 (t, *J* = 7.6 Hz, 8H), 1.73-1.68 (m, 8H), 1.44-1.35 (m, 8H), 1.30-1.20 (m, 24H), 0.88 (t, *J* = 6.9 Hz, 12H); <sup>13</sup>C NMR (150 MHz, CDCl<sub>3</sub>, TMS): δ 145.8, 144.4, 142.1, 141.1, 139.4, 137.4, 135.4, 135.3, 127.2, 126.8, 126.4, 125.3, 124.2, 122.1, 121.5, 72.1, 36.2, 36.0, 35.9, 31.8, 31.6, 29.0, 25.7, 22.6, 14.2; HRMS (APCI) *m/z*: [M+H]<sup>+</sup> calcd. for C<sub>72</sub>H<sub>80</sub>I<sub>2</sub>S<sub>5</sub>, 1359.3026; found, 1359.3027.

**Synthesis of the intermediate D:** Compound the intermediate **D** was synthesized from **1b** (220 mg, 0.24 mmol) with a yield of 90% by following the procedure used for the preparation of the intermediate **C**. Dark red solid; <sup>1</sup>H NMR (400 MHz, CDCl<sub>3</sub>, TMS): δ 7.53 (s, 2H), 7.30 (d, *J* = 5.0 Hz, 2H), 7.18 (d, *J* = 3.7 Hz, 2H), 7.08 (dd, *J* = 5.0, 3.7 Hz, 2H), 6.62-6.57 (m, 4H), 4.37 (s, 2H), 4.20 (s, 2H), 2.58 (d, *J* = 7.3 Hz, 4H), 1.75-1.63 (m, 10H), 1.40-1.28 (m, 16H), 0.93-0.85 (m, 12H); <sup>13</sup>C NMR (100 MHz, CDCl<sub>3</sub>, TMS): δ 145.3, 143.7, 138.0, 135.9, 135.5, 135.5, 135.3, 127.6, 124.9, 124.9, 124.6, 123.7, 121.5, 121.2, 40.1, 40.0, 37.9, 36.2, 36.0, 32.5, 32.4, 29.0, 28.8, 25.8, 25.8, 25.6, 25.6, 23.2, 14.2, 11.0, 10.9; HRMS (APCI) *m/z*: [M+H]<sup>+</sup> calcd. for C<sub>52</sub>H<sub>58</sub>S<sub>5</sub>, 843.3215; found, 843.3208.

**Synthesis of 5b:** Compound **5b** was synthesized from the intermediate **D** (95 mg, 0.11 mmol) with a yield of 55% by following the procedure used for the preparation of **S2a**. Dark red solid; <sup>1</sup>H NMR (400 MHz, CDCl<sub>3</sub>, TMS): δ 7.50 (s, 2H), 7.21 (d, *J* = 3.7 Hz, 2H), 6.84 (d, *J* = 3.7 Hz, 2H), 6.62-6.55 (m, 4H), 4.30 (s, 2H), 4.18 (s, 2H), 2.58 (d, *J* = 6.9 Hz, 4H), 1.75-1.58 (m, 10H), 1.40-1.28 (m, 16H), 0.92-0.85 (m, 12H); <sup>13</sup>C NMR (150 MHz, CDCl<sub>3</sub>, TMS): δ 145.3, 144.3, 141.8, 138.1, 137.3, 135.3, 126.2, 123.8, 123.5, 121.9, 121.1, 72.1, 40.0, 40.0, 37.8, 36.1, 36.0, 32.5, 32.4, 28.9, 28.8, 25.7, 25.6, 25.6, 23.2, 14.2, 11.0, 10.9; HRMS (APCI) *m/z*: [M+H]<sup>+</sup> calcd. for C<sub>52</sub>H<sub>56</sub>I<sub>2</sub>S<sub>5</sub>, 1095.1148; found, 1095.1150.

**Synthesis of 6a:** Compound **6a** was synthesized from **S2a** (34 mg, 0.025 mmol) with a yield of 49% by following the procedure used for the preparation of **5TQ-B(Ph)**. Green solid; <sup>1</sup>H NMR (600 MHz, CDCl<sub>3</sub>, TMS): δ 8.25 (s, 2H), 7.83-7.55 (br), 6.92 (s, 2H), 6.81 (s, 4H), 6.78-6.70 (br), 4.90 (s, 2H), 4.67 (s, 2H), 2.49 (t, *J* = 7.9 Hz, 8H), 1.85-1.72 (br), 1.48-1.42 (m, 8H), 1.34-1.24 (m, 24H), 0.89 (t, *J* = 6.9 Hz, 12H); HRMS (APCI) *m/z*: [M+H]<sup>+</sup> calcd. for C<sub>78</sub>H<sub>80</sub>N<sub>4</sub>S<sub>5</sub>, 1233.5060; found as thermally converted structure, 1177.4440 (C<sub>54</sub>H<sub>48</sub>N<sub>4</sub>S<sub>5</sub>).

**Synthesis of 6b:** Compound **6b** was synthesized from **S2b** (65 mg, 0.059 mmol) with a yield of 64% by following the procedure used for the preparation of **5TQ-B(Ph)**. Green solid; <sup>1</sup>H NMR (400 MHz, CDCl<sub>3</sub>, TMS): δ 7.99 (s, 2H), 7.63 (br), 6.69 (br), 4.92 (s, 2H), 4.63 (s, 2H), 2.77 (br, 4H), 1.88-1.65 (br), 1.44-1.30 (m, 16H), 0.99-0.89 (m, 12); HRMS (APCI) *m/z*: [M+H]<sup>+</sup> calcd. for C<sub>58</sub>H<sub>56</sub>N<sub>4</sub>S<sub>5</sub>, 969.3182; found, 979.3192.

**Synthesis of 5TQ-B3(Ph):** Compound **5TQ-B3(Ph)** was synthesized from **6a** (15 mg, 0.012 mmol) quantitatively, by following the procedure used for the preparation of **5TQ-B5(Ph)**. Blue solid; <sup>1</sup>H NMR (600 MHz, 130 °C, 1,1,2,2-tetrachloroethane-*d*<sub>2</sub>): δ 8.58-8.50 (m, 4H), 8.26-8.05 (m, 2H), 7.89 (s, 2H), 7.75 (s, 4H), 7.25 (s, 2H), 7.03-6.96 (m, 6H), 2.65-2.58 (m, 8H), 1.64-1.55 (m, 8H), 1.42-1.32 (m, 24H), 1.01-0.90 (m, 12H); HRMS (APCI) *m/z*: [M+H]<sup>+</sup> calcd. for C<sub>74</sub>H<sub>72</sub>N<sub>4</sub>S<sub>5</sub>, 1177.4434; found, 1177.4425.

**Synthesis of 5TQ-B3(EH):** Compound **5TQ-B3(EH)** was synthesized from **6b** (15 mg, 0.015 mmol) quantitatively, by following the procedure used for the preparation of **5TQ-B5(Ph)**. Blue solid; <sup>1</sup>H NMR (600 MHz, 130 °C, 1,1,2,2-tetrachloroethane-*d*<sub>2</sub>): δ 8.55-8.50 (m, 2H), 8.30-8.05 (m, 4H), 7.88-7.64 (m, 6H), 7.32-7.26 (m, 2H), 2.94-2.88 (m, 4H), 1.93-1.86 (m, 2H), 1.63-1.48 (m, 16H), 1.11 (t, *J* = 7.6 Hz, 6H), 1.01 (t, *J* = 7.6 Hz, 6H); HRMS (APCI) *m/z*: [M+H]<sup>+</sup> calcd. for C<sub>54</sub>H<sub>48</sub>N<sub>4</sub>S<sub>5</sub>, 913.2556; found, 913.2561.

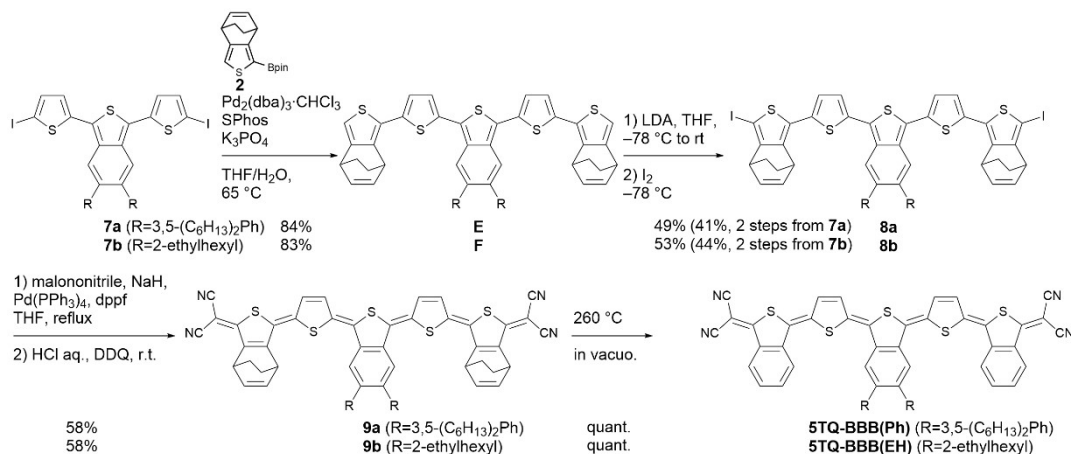

**Scheme S3.** Synthetic route of **5TQ-BBB(Ph)** and **5TQ-BBB(EH)**.

**Synthesis of the intermediate E:** **7a** (100 mg, 0.096 mmol), **2** (61 mg, 0.21 mmol), Pd<sub>2</sub>(dba)<sub>3</sub>·CHCl<sub>3</sub> (10 mg, 0.0096 mmol), SPhos (16 mg, 0.039 mmol), and K<sub>3</sub>PO<sub>4</sub> (82 mg, 0.39 mmol) were placed in a reaction vial and dissolved in THF (1.3 mL)/H<sub>2</sub>O (0.2 mL). The reaction vial was purged with nitrogen and allowed to warm to 50 °C. After stirring for 2 h, the reaction mixture was extracted with EtOAc, washed with water, and the organic layer was dried using MgSO<sub>4</sub>. The extraction was passed through pad of celite and the solvent was removed under reduced pressure, followed by purification with preparative GPC (CHCl<sub>3</sub>) to give the intermediate **E** (89 mg, 84%) as a dark red solid. <sup>1</sup>H NMR (600 MHz, CDCl<sub>3</sub>, TMS): δ 8.01 (s, 2H), 7.33 (d, *J* = 3.4 Hz, 2H), 7.14 (d, *J* = 3.4 Hz, 2H), 6.82 (s, 2H), 6.80 (s, 6H), 6.68 (s, 2H), 6.55-6.52 (m, 4H), 4.38-4.34 (m, 2H), 3.88-3.84 (m, 2H), 2.45 (t, *J* = 7.9 Hz, 8H), 1.66-1.60 (m, 8H), 1.46-1.38 (m, 8H), 1.30-1.26 (m, 24H), 0.89-0.87 (m, 12H); <sup>13</sup>C NMR (150 MHz, CDCl<sub>3</sub>, TMS): δ 148.2, 142.9, 142.3, 141.2, 139.8, 136.5, 135.5, 135.1, 134.7, 127.3, 126.9, 126.3, 125.8, 125.5, 124.3, 122.1, 111.6, 36.8, 35.9, 35.8, 31.8, 31.6, 29.1, 26.0, 25.9, 22.6, 14.2; HRMS (APCI) *m/z*: [M+H]<sup>+</sup> calcd. for C<sub>72</sub>H<sub>82</sub>S<sub>5</sub>, 1107.5093; found, 1107.5093.

**Synthesis of 8a:** Compound **8a** was synthesized from the intermediate **E** (84 mg, 0.076 mmol) with a yield of 49% by following the procedure used for the preparation of **6a**. Dark red solid; <sup>1</sup>H NMR (600 MHz, CDCl<sub>3</sub>, TMS): δ 7.99 (s, 2H), 7.32 (d, *J* = 4.1 Hz, 2H), 7.09 (d, *J* = 3.4 Hz, 2H), 6.82 (s, 2H), 6.80 (s, 4H), 6.55-6.52 (m, 4H), 4.36-4.35 (m, 2H), 3.76-3.73 (m, 2H), 2.45 (t, *J* = 7.9 Hz, 8H), 1.64-1.59 (m, 8H), 1.45-1.38 (m, 8H), 1.32-1.22 (m,

24H), 0.88 (t,  $J = 6.9$  Hz, 12H);  $^{13}\text{C}$  NMR (151 MHz,  $\text{CDCl}_3$ , TMS):  $\delta$  153.2, 146.4, 144.2, 143.0, 142.3, 141.0, 140.0, 135.2, 135.1, 134.8, 129.4, 127.2, 127.0, 126.2, 126.0, 125.8, 122.0, 62.5, 38.0, 36.3, 35.9, 31.8, 31.6, 29.1, 25.5, 25.3, 22.6, 14.2; HRMS (APCI)  $m/z$ :  $[\text{M}+\text{H}]^+$  calcd. for  $\text{C}_{72}\text{H}_{80}\text{I}_2\text{S}_5$ , 1359.3026; found, 1359.3030.

*Synthesis of the intermediate F: 7b* (180 mg, 0.19 mmol), **2** (120 mg, 0.43 mmol),  $\text{Pd}_2(\text{dba})_3 \cdot \text{CHCl}_3$  (20 mg, 0.019 mmol), SPhos (32 mg, 0.077 mmol), and  $\text{K}_3\text{PO}_4$  (160 mg, 0.77 mmol) were placed in a reaction vial and dissolved in THF (2.6 mL)/ $\text{H}_2\text{O}$  (0.4 mL). The reaction vial was purged with nitrogen and allowed to warm to 65 °C. After stirring for 3 h, the reaction mixture was extracted with EtOAc, washed with water, and the organic layer was dried using  $\text{MgSO}_4$ . The extraction was passed through pad of celite and the solvent was removed under reduced pressure, followed by purification with preparative GPC ( $\text{CHCl}_3$ ) to give the intermediate **F** (160 mg, 83%) as a dark red solid.  $^1\text{H}$  NMR (400 MHz,  $\text{CDCl}_3$ , TMS):  $\delta$  7.72 (s, 2H), 7.14 (d,  $J = 4.1$  Hz, 2H), 6.69 (s, 2H), 6.59-6.54 (m, 4H), 4.39-4.35 (m, 2H), 3.88-3.84 (m, 2H), 2.68-2.57 (m, 4H), 1.71-1.59 (m, 10H), 1.44-1.31 (m, 16H), 0.95-0.87 (m, 12H);  $^{13}\text{C}$  NMR (100 MHz,  $\text{CDCl}_3$ , TMS):  $\delta$  148.1, 142.7, 138.6, 135.9, 135.5, 135.2, 135.1, 134.6, 125.4, 125.1, 124.6, 124.4, 121.2, 111.5, 39.7, 37.6, 36.8, 35.8, 32.6, 32.5, 28.9, 28.9, 26.0, 25.9, 25.4, 25.3, 23.2, 14.2, 10.8, 10.7; HRMS (APCI)  $m/z$ :  $[\text{M}+\text{H}]^+$  calcd. for  $\text{C}_{52}\text{H}_{58}\text{S}_5$ , 843.3215; found, 843.3217.

*Synthesis of 8b*: Compound **8b** was synthesized from the intermediate **F** (120 mg, 0.14 mmol) with a yield of 53% by following the procedure used for the preparation of **8a**. dark red solid;  $^1\text{H}$  NMR (400 MHz,  $\text{CDCl}_3$ , TMS):  $\delta$  7.70 (s, 2H), 7.25 (d,  $J = 3.7$  Hz, 2H), 7.09 (d,  $J = 3.7$  Hz, 2H), 6.58-6.50 (m, 4H), 4.39-4.34 (m, 2H), 3.78-3.73 (m, 2H), 2.69-2.54 (m, 4H), 1.69-1.61 (m, 8H), 1.46-1.25 (m, 16H), 0.95-0.85 (m, 12H);  $^{13}\text{C}$  NMR (100 MHz,  $\text{CDCl}_3$ , TMS):  $\delta$  153.2, 142.8, 138.7, 135.6, 135.2, 135.1, 134.6, 129.5, 125.8, 125.1, 124.5, 121.1, 62.4, 39.7, 38.0, 37.5, 36.3, 32.6, 32.5, 28.9, 28.9, 25.5, 25.4, 25.3, 25.3, 23.1, 14.2, 10.8, 10.7; HRMS (APCI)  $m/z$ :  $[\text{M}+\text{H}]^+$  calcd. for  $\text{C}_{52}\text{H}_{56}\text{I}_2\text{S}_5$ , 1095.1148; found, 1095.1134.

*Synthesis of 9a*: Compound **9a** was synthesized from **8a** (34 mg, 0.025 mmol) with a yield of 58% by following the procedure used for the preparation of **5TQ-B(Ph)**. Green solid;  $^1\text{H}$  NMR (600 MHz,  $\text{CDCl}_3$ , TMS):  $\delta$  8.14-8.10 (br), 7.65-7.62 (br), 6.94 (s, 2H), 6.87 (s, 4H), 6.65-6.57 (br), 6.52-6.46 (br), 4.92-4.85 (m, 2H), 4.60-4.55 (m, 2H), 2.51 (t,  $J = 7.6$  Hz, 8H), 1.78-1.65 (m, 8H), 1.50-1.42 (m, 8H), 1.33-1.25 (m, 24H), 0.90 (t,  $J = 6.5$  Hz, 12H); HRMS (APCI)  $m/z$ :  $[\text{M}+\text{H}]^+$  calcd. for  $\text{C}_{78}\text{H}_{80}\text{N}_4\text{S}_5$ , 1233.5060; found, 1233.5052.

*Synthesis of 9b*: Compound **9b** was synthesized from **8b** (70 mg, 0.064 mmol) with a yield of 58% by following the procedure used for the preparation of **5TQ-B(Ph)**. Green solid;  $^1\text{H}$  NMR (400 MHz,  $\text{CDCl}_3$ , TMS):  $\delta$  7.85 (s, 2H), 7.55-7.52 (m, 2H), 6.65-6.58 (m, 2H), 6.55-6.48 (m, 2H), 4.90-4.86 (m, 2H), 4.63-4.57 (m, 2H), 2.78-2.75 (m, 4H), 1.78-1.65 (m, 8H), 1.48-1.30 (m, 16H), 1.00 (t,  $J = 7.3$  Hz, 6H), 0.91 (t,  $J = 6.2$  Hz, 6H); HRMS (APCI)  $m/z$ :  $[\text{M}+\text{H}]^+$  calcd. for  $\text{C}_{58}\text{H}_{56}\text{N}_4\text{S}_5$ , 969.3182; found, 979.3184.

*Synthesis of 5TQ-BBB(Ph)*: Compound **5TQ-BBB(Ph)** was synthesized from **9a** (17 mg, 0.014 mmol) quantitatively, by following the procedure used for the preparation of **5TQ-B5(Ph)**. Blue solid;  $^1\text{H}$  NMR (600 MHz, 130 °C, 1,1,2,2-tetrachloroethane- $d_2$ ):  $\delta$  8.83-8.77 (m, 2H), 8.22 (s, 2H), 8.18-8.05 (br), 7.84-7.55 (br), 7.02 (s, 2H), 6.97 (s, 4H), 2.65-2.58 (m, 8H), 1.64-1.55 (m, 8H), 1.42-1.32 (m, 24H), 1.01-0.90 (m, 12H); HRMS (APCI)  $m/z$ :  $[\text{M}+\text{H}]^+$  calcd. for  $\text{C}_{74}\text{H}_{72}\text{N}_4\text{S}_5$ , 1177.4434; found, 1177.4438.

*Synthesis of 5TQ-BBB(EH)*: Compound **5TQ-BBB(EH)** was synthesized from **9b** (17 mg, 0.018 mmol) quantitatively, by following the procedure used for the preparation of **5TQ-B5(Ph)**. Blue solid;  $^1\text{H}$  NMR (600 MHz, 130 °C, 1,1,2,2-tetrachloroethane- $d_2$ ):  $\delta$  8.82-8.77 (m, 2H), 8.20-8.10 (br), 7.99 (s, 2H), 7.85-7.78 (m, 2H), 7.65-7.55 (br), 7.40-7.25 (br), 2.91-2.87 (m, 4H), 1.92-1.86 (m, 2H), 1.63-1.48 (m, 16H), 1.12 (t,  $J = 7.6$  Hz, 6H), 0.99 (t,  $J = 6.9$  Hz, 6H); HRMS (APCI)  $m/z$ :  $[\text{M}+\text{H}]^+$  calcd. for  $\text{C}_{54}\text{H}_{48}\text{N}_4\text{S}_5$ , 913.2556; found, 913.2549.

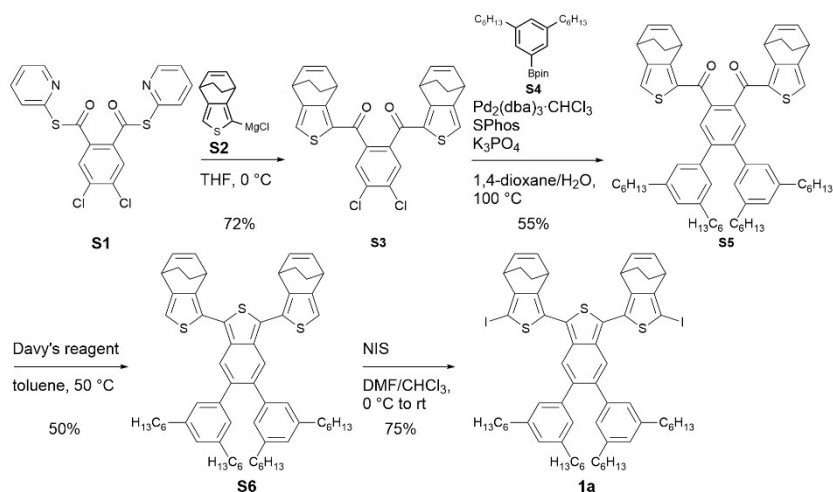

**Scheme S4.** Synthetic route of **1a**.

**Synthesis of S3:** **S1** (653 mg, 1.55 mmol) was placed in a two-necked-bottomed flask, which was filled with N<sub>2</sub> and dissolved in THF (10.4 mL). Grignard reagent **S2** (3.47 mmol, 0.33 M in THF), which was prepared by a reaction of 1-iodo-4,7-dihydro-4,7-ethanobenzo[*c*]thiophene and isopropylmagnesium chloride in THF at -10 °C for 1 h, was added slowly to a solution of **S1** at 0 °C. The reaction mixture was stirred for 30 min. and then quenched by addition of 10% HCl aq.. The resultant mixture was extracted with CHCl<sub>3</sub>, and the combined organic layer was washed with 5% NaOH aq., NaHCO<sub>3</sub> aq., and water. After drying with MgSO<sub>4</sub>, the solvent was removed under reduced pressure. The residue was isolated by column chromatography on silica gel (hexane:EtOAc = 5:1) to give **S3** (580 mg, 72%) as a pale yellow solid. <sup>1</sup>H NMR (400 MHz, CDCl<sub>3</sub>, TMS): δ 7.77-7.75 (m, 2H), 7.04-7.02 (m, 2H), 6.55-6.50 (m, 2H), 6.45-6.38 (m, 2H), 4.14-4.08 (m, 2H), 3.93-3.88 (m, 2H), 1.54-1.48 (m, 8H). This compound was used for next step without further purification.

**Synthesis of S5:** **S3** (580 mg, 1.11 mmol), **S4** (990 mg, 2.66 mmol), Pd<sub>2</sub>(dba)<sub>3</sub>·CHCl<sub>3</sub> (115 mg, 0.111 mmol), SPhos (182 mg, 0.444 mmol), and K<sub>3</sub>PO<sub>4</sub> (942 mg, 4.44 mmol) were placed in a reaction vial and dissolved in 1,4-dioxane (7.4 mL)/H<sub>2</sub>O (2.1 mL). The reaction vial was purged with nitrogen and allowed to warm to 100 °C. After stirring for 14 h, the reaction mixture was extracted with EtOAc, washed with water, and the organic layer was dried using MgSO<sub>4</sub>. The extraction was passed through pad of celite and the solvent was removed under reduced pressure, followed by purification by column chromatography on silica gel (hexane:EtOAc = 7:1) to give **S5** (580 mg, 55%) as a pale yellow oil. <sup>1</sup>H NMR (400 MHz, CDCl<sub>3</sub>, TMS): δ 7.73-7.71 (m, 2H), 7.02-6.98 (m, 2H), 6.81 (s, 2H), 6.78 (s, 4H), 6.51-6.47 (m, 2H), 6.40-6.37 (m, 2H), 4.30-4.26 (m, 2H), 3.90-3.86 (m, 2H), 2.43 (t, *J* = 7.6 Hz, 8H), 1.55-1.50 (m, 8H), 1.45-1.36 (m, 8H), 1.33-1.18 (m, 24H), 0.88 (t, *J* = 7.2 Hz, 12H); <sup>13</sup>C NMR (150 MHz, CDCl<sub>3</sub>, TMS): δ 188.4, 153.3, 148.8, 143.0, 142.5, 139.7, 139.5, 135.7, 134.7, 131.5, 131.1, 127.5, 127.1, 120.1, 36.6, 36.5, 35.8, 31.7, 31.5, 29.0, 26.0, 25.1, 22.6, 14.1; HRMS (APCI) *m/z*: [M+H]<sup>+</sup> calcd. for C<sub>64</sub>H<sub>78</sub>O<sub>2</sub>S<sub>2</sub>, 943.5516; found, 943.5505.

**Synthesis of S6:** Davy's reagent (*p*-tolyl) (143 mg, 0.327 mmol) was added to a solution of **S5** (280 mg, 0.297 mmol) in toluene (4.3 mL) and stirred at 50 °C for 1 h. The reaction mixture was passed through pad of silica gel and the solvent was removed under reduced pressure, followed by purification by column chromatography on silica gel (hexane:CH<sub>2</sub>Cl<sub>2</sub> = 5:1) to give **S6** (140 mg, 50%) as an orange oil. <sup>1</sup>H NMR (400 MHz, CDCl<sub>3</sub>, TMS): δ 7.79 (s, 2H), 6.84 (s, 2H), 6.76 (s, 6H), 6.58-6.55 (m, 4H), 4.25-4.20 (m, 2H), 3.94-3.88 (m, 2H), 2.42 (t, *J* = 7.8 Hz, 8H), 1.75-1.62 (m, 8H), 1.44-1.34 (m, 8H), 1.28-1.22 (m, 24H), 0.88 (t, *J* = 6.9 Hz, 12H); <sup>13</sup>C NMR (100 MHz, CDCl<sub>3</sub>, TMS): δ 147.9, 144.5, 142.0, 141.3, 139.0, 135.8, 135.3, 135.2, 129.8, 128.5, 127.2, 126.7, 125.9, 122.4, 122.1, 113.4, 77.3, 77.0, 76.7, 37.0, 36.0, 35.9, 31.8, 31.6, 29.0, 26.2, 26.1, 22.6, 14.2; HRMS (APCI) *m/z*: [M+H]<sup>+</sup> calcd. for C<sub>64</sub>H<sub>78</sub>S<sub>3</sub>, 943.5339; found, 943.5330.

**Synthesis of 1a:** NIS (100 mg, 0.445 mmol) was added to a solution of intermediate **S6** (200 mg, 0.212 mmol) in DMF (16 mL) and CHCl<sub>3</sub> (1.6 mL) at 0 °C. Then, this reaction was allowed to warm to room temperature. After stirring overnight, the reaction was quenched by addition of Na<sub>2</sub>SO<sub>3</sub> aq.. The combined organic was extracted with EtOAc and washed with water. After drying with MgSO<sub>4</sub>, the solvent was removed under reduced pressure and purified by column chromatography on silica gel (hexane:CH<sub>2</sub>Cl<sub>2</sub> = 10:1) to give **1a** (190 mg, 75%) as an orange solid. <sup>1</sup>H NMR (400 MHz, CDCl<sub>3</sub>, TMS): δ 7.73 (s, 2H), 6.77 (s, 2H), 6.74 (s, 4H), 6.57-6.53 (m, 4H),

4.24-4.20 (m, 2H), 3.83-3.78 (m, 2H), 2.42 (t,  $J = 7.8$  Hz, 8H), 1.71-1.62 (m, 8H), 1.44-1.20 (m, 32H), 0.88 (t,  $J = 6.9$  Hz, 12H);  $^{13}\text{C}$  NMR (101 MHz,  $\text{CDCl}_3$ , TMS):  $\delta$  153.1, 145.1, 142.2, 141.1, 139.7, 135.6, 135.5, 135.3, 127.5, 127.3, 127.0, 125.3, 121.9, 64.3, 38.2, 36.5, 36.0, 31.9, 31.7, 29.1, 25.8, 25.6, 22.7, 14.3; HRMS (APCI)  $m/z$ :  $[\text{M}+\text{H}]^+$  calcd. for  $\text{C}_{64}\text{H}_{76}\text{I}_2\text{S}_3$ , 1195.3272; found, 1195.3274.

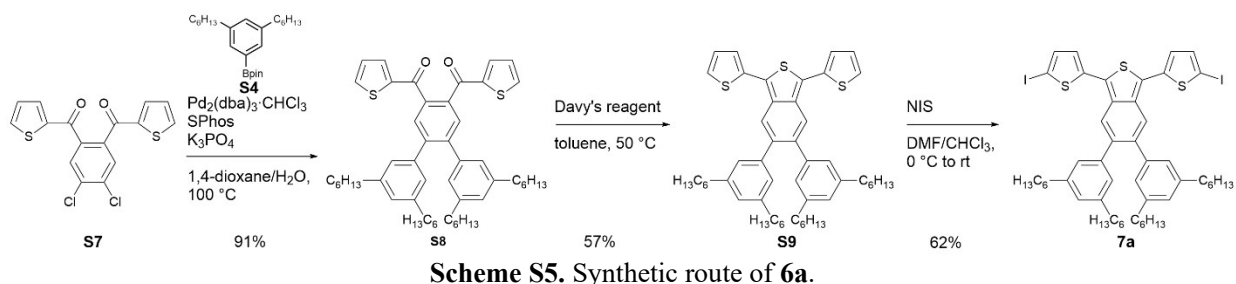

**Synthesis of S8:** Compound **S8** was synthesized from **S7** (440 mg, 0.840 mmol) with a yield of 91% by following the procedure used for the preparation of **S5**. Pale yellow oil;  $^1\text{H}$  NMR (600 MHz,  $\text{CDCl}_3$ , TMS):  $\delta$  7.79 (s, 2H), 7.66 (d,  $J = 4.8$  Hz, 2H), 7.58 (d,  $J = 4.1$  Hz, 2H), 7.08 (dd,  $J = 4.1, 4.8$  Hz, 2H), 6.84 (s, 2H), 6.79 (s, 4H), 2.44 (t,  $J = 7.9$  Hz, 8H), 1.46-1.37 (m, 8H), 1.32-1.20 (m, 24H), 0.88 (t,  $J = 6.9$  Hz, 12H);  $^{13}\text{C}$  NMR (150 MHz,  $\text{CDCl}_3$ , TMS):  $\delta$  188.2, 144.3, 143.6, 142.7, 139.5, 138.0, 135.2, 134.8, 131.1, 128.0, 127.6, 127.1, 35.8, 31.7, 31.5, 29.0, 22.6, 14.1; HRMS (APCI)  $m/z$ :  $[\text{M}+\text{H}]^+$  calcd. for  $\text{C}_{52}\text{H}_{66}\text{O}_2\text{S}_2$ , 787.4577; found, 787.4562.

**Synthesis of S9:** Compound **S9** was synthesized from **S8** (600 mg, 0.764 mmol) with a yield of 57% by following the procedure used for the preparation of **S6**. Orange oil.;  $^1\text{H}$  NMR (400 MHz,  $\text{CDCl}_3$ , TMS):  $\delta$  7.97 (s, 2H), 7.39-7.36 (m, 4H), 7.14 (dd,  $J = 5.3, 3.4$  Hz, 2H), 6.80 (s, 2H), 6.77 (s, 4H), 2.44 (t,  $J = 7.6$  Hz, 8H), 1.47-1.35 (m, 8H), 1.29-1.23 (m, 24H), 0.89 (t,  $J = 6.9$  Hz, 12H);  $^{13}\text{C}$  NMR (100 MHz,  $\text{CDCl}_3$ , TMS):  $\delta$  142.2, 141.1, 139.7, 135.7, 134.7, 127.9, 127.3, 126.9, 126.3, 125.6, 125.4, 121.9, 35.9, 31.8, 31.6, 29.0, 22.6, 14.2; HRMS (APCI)  $m/z$ :  $[\text{M}+\text{H}]^+$  calcd. for  $\text{C}_{52}\text{H}_{66}\text{S}_3$ , 787.4400; found, 787.4395.

**Synthesis of 7a:** Compound **7a** was synthesized from **S9** (444 mg, 0.056 mmol) with a yield of 62% by following the procedure used for the preparation of **7a**. Orange oil;  $^1\text{H}$  NMR (600 MHz,  $\text{CDCl}_3$ , TMS):  $\delta$  7.86 (s, 2H), 7.28 (d,  $J = 3.4$  Hz, 2H), 7.04 (d,  $J = 3.4$  Hz, 2H), 6.81 (s, 2H), 6.75 (s, 4H), 2.44 (t,  $J = 7.9$  Hz, 8H), 1.45-1.38 (m, 8H), 1.33-1.22 (m, 24H), 0.89 (t,  $J = 6.9$  Hz, 12H);  $^{13}\text{C}$  NMR (151 MHz,  $\text{CDCl}_3$ , TMS):  $\delta$  142.3, 141.4, 140.9, 140.3, 137.8, 134.9, 127.2, 127.1, 127.0, 125.6, 121.6, 73.3, 35.8, 31.8, 31.6, 29.0, 22.6, 14.2; HRMS (APCI)  $m/z$ :  $[\text{M}+\text{H}]^+$  calcd. for  $\text{C}_{52}\text{H}_{64}\text{I}_2\text{S}_3$ , 1039.2333; found, 1039.2338.

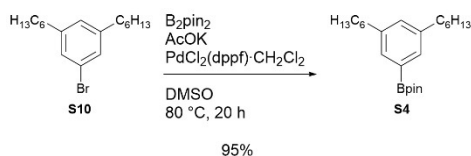

**Synthesis of S4:** **S10** (1.43 g, 4.40 mmol),  $\text{B}_2\text{pin}_2$  (1.24 g, 4.90 mmol), AcOK (1.31 g, 13.4 mmol), and  $\text{PdCl}_2(\text{dppf})\cdot\text{CH}_2\text{Cl}_2$  (180 mg, 0.220 mmol) were placed in a reaction vial and dissolved in DMSO (40 mL). The reaction vial was purged with nitrogen and allowed to warm to 80 °C. After stirring for 20 h, the reaction mixture was extracted with EtOAc, washed with water, and the organic layer was dried using  $\text{MgSO}_4$ . The extraction was passed through pad of celite and the solvent was removed under reduced pressure, followed by purification by column chromatography on silica gel (hexane:EtOAc = 15:1) to give **S4** (1.55 g, 95%) as a pale yellow oil.  $^1\text{H}$  NMR (400 MHz,  $\text{CDCl}_3$ , TMS):  $\delta$  7.45 (s, 2H), 7.10 (s, 1H), 2.57 (t,  $J = 8.0$  Hz, 4H), 1.65-1.58 (m, 4H), 1.35 (s, 12H), 1.33-1.24 (m, 12H), 0.90-0.86 (m, 6H). This compound was used for the next reaction without further purification.

## OFET and NIR OPT device fabrication and evaluation

The field-effect electron mobility was measured using bottom-gate bottom-contact OFET devices. The p-doped silicon substrate functions as the gate electrode. A thermally grown silicon oxide (SiO<sub>2</sub>) dielectric layer on the gate substrate has 300 nm thick and a capacitance of 10.0 nF cm<sup>-2</sup>. Interdigital source and drain electrodes were constructed with gold (30 nm) that were formed on the SiO<sub>2</sub> layer. The channel width (*W*) and channel length (*L*) are 38 mm and 5 μm, respectively. The silicon oxide surface was first washed with toluene, acetone, purified water and 2-propanol. It was then activated by ozone treatment and pretreated with HMDS. The semiconducting layer was fabricated by drop coating from 0.1 wt% 1,1,2,2-tetrachloroethane solution onto the substrate at 150 °C for **5TQ-B5(EH)** and **5TQ-B3(EH)** in N<sub>2</sub> atmosphere, followed by annealing for 20 min at the same temperature. The semiconducting layer of **5TQ-BBB(EH)** was fabricated by the thermal conversion (190 °C for 20 min in N<sub>2</sub> atmosphere) of **9b** film, which was prepared by spin-coating (1000 rpm, 1 min) from a 0.3 wt% CHCl<sub>3</sub> solution of **9b** onto the HMDS-modified Si/SiO<sub>2</sub> substrate. The characteristics of the OFETs were measured at room temperature under a pressure of 10<sup>-3</sup> Pa by using a KEITHLEY 4200 semiconductor parameter analyzer. The μ was calculated in the saturated region by the following equation.

$$I_{DS} = \frac{W}{2L} C_i \mu (V_{GS} - V_{th})^2$$

Current on/off ratio was determined from the *I*<sub>SD</sub> sat *V*<sub>GS</sub>= 0 V (*I*<sub>off</sub>) and *V*<sub>GS</sub>= ±50 V (*I*<sub>on</sub>).

The NIR-OPT using bulk-heterojunction configuration of the **5TQ-B5(EH)/2CF<sub>3</sub>BP** was fabricated by the thermal conversion (200 °C for 20 min in N<sub>2</sub> atmosphere) of **5TQ-B(EH)/2CF<sub>3</sub>BP** film, which was prepared by spin-coating (1000 rpm, 1 min) from a 0.05/0.25 wt% CHCl<sub>3</sub> blended solution of **5TQ-B(EH)/2CF<sub>3</sub>BP-pre** onto the HMDS-modified Si/SiO<sub>2</sub> substrate. The photoresponse were evaluated by 810 nm LED light with the power of 143 mW cm<sup>-2</sup> under a pressure of 10<sup>-3</sup> Pa using a KEITHLEY 4200 semiconductor parameter analyzer.

## Computational details

All calculations were conducted using Gaussian 09 program. The geometry was optimized with the unrestricted Becke Hybrid (UB3LYP) at 6-31G(d,p) level. The time-dependent density functional theory (TD-DFT) calculation was conducted for the estimation of excited singlet (S<sub>0</sub>) and triplet (T<sub>1</sub>) energies at the CAM-B3LYP/6-31G(d,p) level of theory with Tamm–Dancoff approximation. The frequencies calculations have been performed within the DFT framework with B3LYP energy functional and the 6-31G(d,p) basis set. NICS(1.7)zz values were calculated at the B3LYP/6-31G(d,p) level of theory.

Optimized structure of **5TQ-B5(H)** at UB3LYP/6-31G(d,p).

| Center Number | Atomic Number | Atomic Type | Coordinates (Angstroms) |           |           |
|---------------|---------------|-------------|-------------------------|-----------|-----------|
|               |               |             | X                       | Y         | Z         |
| 1             | 6             | 0           | 8.385454                | -1.463820 | 0.528032  |
| 2             | 6             | 0           | 6.962923                | -1.405073 | 0.457940  |
| 3             | 16            | 0           | 7.794270                | 1.101233  | 0.373892  |
| 4             | 6             | 0           | 9.011182                | -0.153785 | 0.489824  |
| 5             | 6             | 0           | 0.712586                | -1.161363 | -1.130207 |
| 6             | 6             | 0           | -0.712704               | -1.161410 | -1.129801 |
| 7             | 6             | 0           | -1.305302               | 0.138521  | -0.830533 |
| 8             | 16            | 0           | 0.000004                | 1.340356  | -0.705110 |
| 9             | 6             | 0           | 1.305291                | 0.138579  | -0.831236 |
| 10            | 6             | 0           | 6.433608                | -0.053234 | 0.315888  |
| 11            | 6             | 0           | 2.629831                | 3.034743  | -0.592559 |
| 12            | 6             | 0           | 3.322651                | 4.204429  | -0.307990 |
| 13            | 6             | 0           | 4.626391                | 4.147452  | 0.193385  |
| 14            | 6             | 0           | 5.259288                | 2.921677  | 0.356308  |
| 15            | 6             | 0           | 5.143651                | 0.372300  | 0.082015  |
| 16            | 16            | 0           | 3.857571                | -0.778312 | -0.331231 |

|    |    |   |            |           |           |
|----|----|---|------------|-----------|-----------|
| 17 | 6  | 0 | 2.619556   | 0.473864  | -0.590217 |
| 18 | 6  | 0 | 3.234364   | 1.780589  | -0.392436 |
| 19 | 6  | 0 | 4.595432   | 1.725973  | 0.027533  |
| 20 | 6  | 0 | -6.963036  | -1.405044 | 0.458546  |
| 21 | 6  | 0 | -8.385608  | -1.463729 | 0.527738  |
| 22 | 6  | 0 | -9.011234  | -0.153646 | 0.489338  |
| 23 | 16 | 0 | -7.794170  | 1.101343  | 0.374361  |
| 24 | 6  | 0 | -6.433562  | -0.053243 | 0.316892  |
| 25 | 6  | 0 | -6.236085  | -2.604835 | 0.569314  |
| 26 | 6  | 0 | -6.903248  | -3.818166 | 0.690870  |
| 27 | 6  | 0 | -8.301802  | -3.870944 | 0.714621  |
| 28 | 6  | 0 | -9.044101  | -2.699829 | 0.644123  |
| 29 | 6  | 0 | -5.143473  | 0.372172  | 0.083579  |
| 30 | 6  | 0 | -2.619454  | 0.473794  | -0.588914 |
| 31 | 16 | 0 | -3.857376  | -0.778460 | -0.329517 |
| 32 | 6  | 0 | -4.595185  | 1.725813  | 0.029411  |
| 33 | 6  | 0 | -3.234190  | 1.780497  | -0.390767 |
| 34 | 6  | 0 | 10.348549  | 0.207435  | 0.536836  |
| 35 | 6  | 0 | -5.258944  | 2.921404  | 0.358773  |
| 36 | 6  | 0 | -4.626058  | 4.147220  | 0.196117  |
| 37 | 6  | 0 | -3.322424  | 4.204315  | -0.305530 |
| 38 | 6  | 0 | -2.629673  | 3.034709  | -0.590603 |
| 39 | 6  | 0 | 1.398969   | -2.339265 | -1.473862 |
| 40 | 6  | 0 | 0.698535   | -3.499999 | -1.780106 |
| 41 | 6  | 0 | -0.698859  | -3.500052 | -1.779678 |
| 42 | 6  | 0 | -1.399202  | -2.339372 | -1.473022 |
| 43 | 6  | 0 | 9.043833   | -2.699925 | 0.644999  |
| 44 | 6  | 0 | 8.301460   | -3.871011 | 0.715142  |
| 45 | 6  | 0 | 6.902926   | -3.818185 | 0.690428  |
| 46 | 6  | 0 | 6.235879   | -2.604848 | 0.568306  |
| 47 | 6  | 0 | -10.348606 | 0.207641  | 0.535603  |
| 48 | 6  | 0 | 10.716748  | 1.585566  | 0.499462  |
| 49 | 7  | 0 | 10.989527  | 2.718269  | 0.470143  |
| 50 | 6  | 0 | 11.421114  | -0.725053 | 0.621105  |
| 51 | 7  | 0 | 12.314943  | -1.470276 | 0.689769  |
| 52 | 6  | 0 | -10.716711 | 1.585797  | 0.498239  |
| 53 | 7  | 0 | -10.989422 | 2.718517  | 0.468942  |
| 54 | 6  | 0 | -11.421270 | -0.724806 | 0.619079  |
| 55 | 7  | 0 | -12.315181 | -1.469985 | 0.687151  |
| 56 | 1  | 0 | 1.627838   | 3.107462  | -0.991806 |
| 57 | 1  | 0 | 2.841617   | 5.164025  | -0.468637 |
| 58 | 1  | 0 | 5.155407   | 5.059829  | 0.448518  |
| 59 | 1  | 0 | 6.263366   | 2.911609  | 0.756264  |
| 60 | 1  | 0 | -5.155570  | -2.600880 | 0.597020  |
| 61 | 1  | 0 | -6.325949  | -4.733506 | 0.778059  |
| 62 | 1  | 0 | -8.810787  | -4.824732 | 0.806610  |
| 63 | 1  | 0 | -10.123851 | -2.745296 | 0.688790  |
| 64 | 1  | 0 | -6.262898  | 2.911161  | 0.759051  |
| 65 | 1  | 0 | -5.154965  | 5.059529  | 0.451714  |
| 66 | 1  | 0 | -2.841383  | 5.163948  | -0.465939 |
| 67 | 1  | 0 | -1.627726  | 3.107559  | -0.989944 |
| 68 | 1  | 0 | 2.477274   | -2.347854 | -1.552791 |
| 69 | 1  | 0 | 1.244165   | -4.398725 | -2.049579 |
| 70 | 1  | 0 | -1.244586  | -4.398822 | -2.048810 |
| 71 | 1  | 0 | -2.477554  | -2.348056 | -1.551286 |
| 72 | 1  | 0 | 10.123554  | -2.745411 | 0.690373  |
| 73 | 1  | 0 | 8.810353   | -4.824803 | 0.807579  |



|    |   |   |          |           |          |
|----|---|---|----------|-----------|----------|
| 74 | 1 | 0 | 6.325534 | -4.733498 | 0.777290 |
| 75 | 1 | 0 | 5.155349 | -2.600891 | 0.595229 |

-----

Optimized structure of **5TQ-B3(H)** at UB3LYP/6-31G(d,p).

| Center<br>Number | Atomic<br>Number | Atomic<br>Type | Coordinates (Angstroms) |           |           |
|------------------|------------------|----------------|-------------------------|-----------|-----------|
|                  |                  |                | X                       | Y         | Z         |
| 1                | 6                | 0              | -8.082352               | -1.970949 | 0.720721  |
| 2                | 6                | 0              | -6.789303               | -1.768686 | 0.339353  |
| 3                | 16               | 0              | -7.768613               | 0.638793  | 0.693792  |
| 4                | 6                | 0              | -8.803758               | -0.758012 | 0.966735  |
| 5                | 6                | 0              | -0.712746               | -1.532192 | -1.255405 |
| 6                | 6                | 0              | 0.712677                | -1.532226 | -1.255373 |
| 7                | 6                | 0              | 1.304604                | -0.224239 | -0.996467 |
| 8                | 16               | 0              | 0.000017                | 0.977091  | -0.887737 |
| 9                | 6                | 0              | -1.304624               | -0.224189 | -0.996482 |
| 10               | 6                | 0              | -6.384696               | -0.395440 | 0.252517  |
| 11               | 6                | 0              | -5.132329               | 0.060391  | -0.105948 |
| 12               | 16               | 0              | -3.867014               | -1.115010 | -0.486251 |
| 13               | 6                | 0              | -2.620768               | 0.123229  | -0.777000 |
| 14               | 6                | 0              | -3.233689               | 1.440089  | -0.640213 |
| 15               | 6                | 0              | -4.604999               | 1.404142  | -0.250190 |
| 16               | 6                | 0              | 6.789327                | -1.768772 | 0.339426  |
| 17               | 6                | 0              | 8.082382                | -1.970982 | 0.720800  |
| 18               | 6                | 0              | 8.803755                | -0.758013 | 0.966765  |
| 19               | 16               | 0              | 7.768574                | 0.638755  | 0.693761  |
| 20               | 6                | 0              | 6.384688                | -0.395538 | 0.252535  |
| 21               | 6                | 0              | 5.132320                | 0.060271  | -0.105946 |
| 22               | 6                | 0              | 2.620768                | 0.123149  | -0.777039 |
| 23               | 16               | 0              | 3.866982                | -1.115110 | -0.486220 |
| 24               | 6                | 0              | 4.605028                | 1.404027  | -0.250242 |
| 25               | 6                | 0              | 3.233733                | 1.439997  | -0.640310 |
| 26               | 6                | 0              | -10.128075              | -0.641032 | 1.362740  |
| 27               | 6                | 0              | -1.399404               | -2.720915 | -1.559961 |
| 28               | 6                | 0              | -0.699080               | -3.889736 | -1.830964 |
| 29               | 6                | 0              | 0.698899                | -3.889778 | -1.830912 |
| 30               | 6                | 0              | 1.399278                | -2.720997 | -1.559874 |
| 31               | 6                | 0              | 10.128066               | -0.640981 | 1.362768  |
| 32               | 6                | 0              | -2.632746               | 2.686939  | -0.891591 |
| 33               | 6                | 0              | -3.351913               | 3.862099  | -0.714200 |
| 34               | 6                | 0              | -4.685385               | 3.824930  | -0.290405 |
| 35               | 6                | 0              | -5.311880               | 2.606642  | -0.068694 |
| 36               | 6                | 0              | 5.311944                | 2.606506  | -0.068755 |
| 37               | 6                | 0              | 4.685499                | 3.824805  | -0.290543 |
| 38               | 6                | 0              | 3.352050                | 3.862000  | -0.714410 |
| 39               | 6                | 0              | 2.632846                | 2.686857  | -0.891775 |
| 40               | 6                | 0              | -10.728979              | 0.631758  | 1.569820  |
| 41               | 7                | 0              | -11.189289              | 1.690875  | 1.729843  |
| 42               | 6                | 0              | -10.916207              | -1.809258 | 1.568999  |
| 43               | 7                | 0              | -11.538474              | -2.781545 | 1.730168  |
| 44               | 6                | 0              | 10.728939               | 0.631834  | 1.569788  |
| 45               | 7                | 0              | 11.189226               | 1.690966  | 1.729774  |
| 46               | 6                | 0              | 10.916226               | -1.809178 | 1.569084  |
| 47               | 7                | 0              | 11.538539               | -2.781437 | 1.730248  |
| 48               | 1                | 0              | -8.551255               | -2.940380 | 0.835329  |

|    |   |   |           |           |           |
|----|---|---|-----------|-----------|-----------|
| 49 | 1 | 0 | -6.105462 | -2.579291 | 0.113974  |
| 50 | 1 | 0 | 6.105510  | -2.579406 | 0.114078  |
| 51 | 1 | 0 | 8.551314  | -2.940394 | 0.835445  |
| 52 | 1 | 0 | -2.478123 | -2.734673 | -1.631238 |
| 53 | 1 | 0 | -1.244496 | -4.797440 | -2.068402 |
| 54 | 1 | 0 | 1.244277  | -4.797520 | -2.068290 |
| 55 | 1 | 0 | 2.477999  | -2.734834 | -1.631079 |
| 56 | 1 | 0 | -1.616504 | 2.749730  | -1.254668 |
| 57 | 1 | 0 | -2.873133 | 4.815324  | -0.914738 |
| 58 | 1 | 0 | -5.239504 | 4.747078  | -0.149605 |
| 59 | 1 | 0 | -6.350868 | 2.602241  | 0.232487  |
| 60 | 1 | 0 | 6.350918  | 2.602075  | 0.232487  |
| 61 | 1 | 0 | 5.239639  | 4.746941  | -0.149745 |
| 62 | 1 | 0 | 2.873316  | 4.815232  | -0.915022 |
| 63 | 1 | 0 | 1.616625  | 2.749663  | -1.254904 |

-----  
Optimized structure of **5TQ-BBB(H)** at UB3LYP/6-31G(d,p).  
-----

| Center<br>Number | Atomic<br>Number | Atomic<br>Type | Coordinates (Angstroms) |           |           |
|------------------|------------------|----------------|-------------------------|-----------|-----------|
|                  |                  |                | X                       | Y         | Z         |
| 1                | 6                | 0              | 8.803306                | 0.407898  | 0.000250  |
| 2                | 6                | 0              | 7.419038                | 0.750541  | 0.000216  |
| 3                | 16               | 0              | 7.507982                | -1.892908 | 0.000000  |
| 4                | 6                | 0              | 9.033687                | -1.028051 | 0.000127  |
| 5                | 6                | 0              | 0.713664                | 1.553105  | -0.000336 |
| 6                | 6                | 0              | -0.713664               | 1.553105  | -0.000352 |
| 7                | 6                | 0              | -1.294895               | 0.224957  | -0.000330 |
| 8                | 16               | 0              | 0.000000                | -0.987203 | -0.000405 |
| 9                | 6                | 0              | 1.294895                | 0.224957  | -0.000312 |
| 10               | 6                | 0              | 6.539172                | -0.398602 | 0.000065  |
| 11               | 6                | 0              | 5.164756                | -0.503460 | -0.000032 |
| 12               | 16               | 0              | 4.033746                | 0.867133  | -0.000033 |
| 13               | 6                | 0              | 2.608225                | -0.199067 | -0.000224 |
| 14               | 6                | 0              | 3.056984                | -1.560549 | -0.000261 |
| 15               | 6                | 0              | 4.408701                | -1.724311 | -0.000164 |
| 16               | 6                | 0              | -7.419037               | 0.750541  | 0.000137  |
| 17               | 6                | 0              | -8.803307               | 0.407898  | 0.000176  |
| 18               | 6                | 0              | -9.033687               | -1.028051 | 0.000162  |
| 19               | 16               | 0              | -7.507982               | -1.892909 | 0.000110  |
| 20               | 6                | 0              | -6.539172               | -0.398602 | 0.000074  |
| 21               | 6                | 0              | -7.051506               | 2.108932  | 0.000159  |
| 22               | 6                | 0              | -8.032127               | 3.092055  | 0.000211  |
| 23               | 6                | 0              | -9.391550               | 2.750618  | 0.000242  |
| 24               | 6                | 0              | -9.781027               | 1.417786  | 0.000225  |
| 25               | 6                | 0              | -5.164755               | -0.503461 | -0.000022 |
| 26               | 6                | 0              | -2.608225               | -0.199067 | -0.000227 |
| 27               | 16               | 0              | -4.033746               | 0.867132  | -0.000069 |
| 28               | 6                | 0              | -4.408701               | -1.724311 | -0.000110 |
| 29               | 6                | 0              | -3.056984               | -1.560549 | -0.000218 |
| 30               | 6                | 0              | 10.219959               | -1.746152 | 0.000091  |
| 31               | 6                | 0              | 1.403958                | 2.779221  | -0.000369 |
| 32               | 6                | 0              | 0.700650                | 3.975804  | -0.000410 |
| 33               | 6                | 0              | -0.700650               | 3.975804  | -0.000431 |
| 34               | 6                | 0              | -1.403958               | 2.779220  | -0.000409 |
| 35               | 6                | 0              | 9.781027                | 1.417786  | 0.000400  |

|    |   |   |            |           |           |
|----|---|---|------------|-----------|-----------|
| 36 | 6 | 0 | 9.391550   | 2.750618  | 0.000513  |
| 37 | 6 | 0 | 8.032127   | 3.092055  | 0.000484  |
| 38 | 6 | 0 | 7.051506   | 2.108932  | 0.000341  |
| 39 | 6 | 0 | -10.219959 | -1.746152 | 0.000191  |
| 40 | 6 | 0 | 10.190620  | -3.172254 | -0.000041 |
| 41 | 7 | 0 | 10.137069  | -4.336537 | -0.000149 |
| 42 | 6 | 0 | 11.510198  | -1.144736 | 0.000178  |
| 43 | 7 | 0 | 12.576269  | -0.672903 | 0.000247  |
| 44 | 6 | 0 | -10.190621 | -3.172254 | 0.000168  |
| 45 | 7 | 0 | -10.137070 | -4.336537 | 0.000148  |
| 46 | 6 | 0 | -11.510198 | -1.144735 | 0.000244  |
| 47 | 7 | 0 | -12.576268 | -0.672900 | 0.000285  |
| 48 | 1 | 0 | 2.360686   | -2.391118 | -0.000359 |
| 49 | 1 | 0 | 4.890003   | -2.695160 | -0.000174 |
| 50 | 1 | 0 | -6.010585  | 2.404256  | 0.000140  |
| 51 | 1 | 0 | -7.738126  | 4.137120  | 0.000230  |
| 52 | 1 | 0 | -10.147299 | 3.529125  | 0.000282  |
| 53 | 1 | 0 | -10.833040 | 1.166345  | 0.000251  |
| 54 | 1 | 0 | -4.890003  | -2.695160 | -0.000085 |
| 55 | 1 | 0 | -2.360686  | -2.391119 | -0.000294 |
| 56 | 1 | 0 | 2.485401   | 2.807230  | -0.000393 |
| 57 | 1 | 0 | 1.242906   | 4.915916  | -0.000440 |
| 58 | 1 | 0 | -1.242907  | 4.915916  | -0.000479 |
| 59 | 1 | 0 | -2.485401  | 2.807230  | -0.000464 |
| 60 | 1 | 0 | 10.833040  | 1.166346  | 0.000432  |
| 61 | 1 | 0 | 10.147298  | 3.529126  | 0.000627  |
| 62 | 1 | 0 | 7.738126   | 4.137120  | 0.000580  |
| 63 | 1 | 0 | 6.010585   | 2.404255  | 0.000341  |

-----

Optimized structure of **5TQ-B(H)** at UB3LYP/6-31G(d,p).

| Center<br>Number | Atomic<br>Number | Atomic<br>Type | Coordinates (Angstroms) |           |           |
|------------------|------------------|----------------|-------------------------|-----------|-----------|
|                  |                  |                | X                       | Y         | Z         |
| 1                | 6                | 0              | 8.626460                | -0.912900 | -0.000010 |
| 2                | 6                | 0              | 7.268859                | -1.074848 | -0.000009 |
| 3                | 16               | 0              | 7.643174                | 1.526866  | -0.000001 |
| 4                | 6                | 0              | 9.041786                | 0.457606  | -0.000006 |
| 5                | 6                | 0              | 0.714237                | -1.748679 | 0.000005  |
| 6                | 6                | 0              | -0.714239               | -1.748677 | 0.000005  |
| 7                | 6                | 0              | -1.292639               | -0.421993 | 0.000006  |
| 8                | 16               | 0              | 0.000002                | 0.787185  | 0.000009  |
| 9                | 6                | 0              | 1.292639                | -0.421995 | 0.000006  |
| 10               | 6                | 0              | 6.526126                | 0.142166  | -0.000004 |
| 11               | 6                | 0              | 5.153053                | 0.305803  | 0.000001  |
| 12               | 16               | 0              | 4.030699                | -1.065929 | -0.000002 |
| 13               | 6                | 0              | 2.610237                | 0.002819  | 0.000006  |
| 14               | 6                | 0              | 3.057712                | 1.362382  | 0.000011  |
| 15               | 6                | 0              | 4.414154                | 1.526592  | 0.000008  |
| 16               | 6                | 0              | -7.268858               | -1.074846 | -0.000008 |
| 17               | 6                | 0              | -8.626459               | -0.912899 | -0.000011 |
| 18               | 6                | 0              | -9.041786               | 0.457607  | -0.000009 |
| 19               | 16               | 0              | -7.643174               | 1.526868  | -0.000002 |
| 20               | 6                | 0              | -6.526124               | 0.142167  | -0.000003 |
| 21               | 6                | 0              | -5.153052               | 0.305805  | -0.000001 |
| 22               | 6                | 0              | -2.610236               | 0.002823  | 0.000006  |

|    |    |   |            |           |           |
|----|----|---|------------|-----------|-----------|
| 23 | 16 | 0 | -4.030698  | -1.065927 | -0.000002 |
| 24 | 6  | 0 | -4.414154  | 1.526594  | 0.000006  |
| 25 | 6  | 0 | -3.057711  | 1.362385  | 0.000010  |
| 26 | 6  | 0 | 10.348302  | 0.929855  | -0.000005 |
| 27 | 6  | 0 | 1.405054   | -2.975551 | 0.000005  |
| 28 | 6  | 0 | 0.701177   | -4.170857 | 0.000004  |
| 29 | 6  | 0 | -0.701186  | -4.170855 | 0.000004  |
| 30 | 6  | 0 | -1.405060  | -2.975547 | 0.000004  |
| 31 | 6  | 0 | -10.348301 | 0.929855  | -0.000012 |
| 32 | 6  | 0 | 10.632836  | 2.323019  | 0.000001  |
| 33 | 7  | 0 | 10.830570  | 3.472152  | 0.000005  |
| 34 | 6  | 0 | 11.436748  | 0.012221  | -0.000009 |
| 35 | 7  | 0 | 12.308885  | -0.761280 | -0.000009 |
| 36 | 6  | 0 | -10.632837 | 2.323018  | -0.000006 |
| 37 | 7  | 0 | -10.830573 | 3.472151  | -0.000005 |
| 38 | 6  | 0 | -11.436747 | 0.012219  | -0.000021 |
| 39 | 7  | 0 | -12.308883 | -0.761282 | 0.000025  |
| 40 | 1  | 0 | 9.347942   | -1.720631 | -0.000014 |
| 41 | 1  | 0 | 6.781376   | -2.043634 | -0.000012 |
| 42 | 1  | 0 | 2.361064   | 2.192800  | 0.000017  |
| 43 | 1  | 0 | 4.903503   | 2.493622  | 0.000012  |
| 44 | 1  | 0 | -6.781374  | -2.043632 | -0.000009 |
| 45 | 1  | 0 | -9.347940  | -1.720631 | -0.000016 |
| 46 | 1  | 0 | -4.903503  | 2.493624  | 0.000007  |
| 47 | 1  | 0 | -2.361064  | 2.192804  | 0.000016  |
| 48 | 1  | 0 | 2.486458   | -3.005464 | 0.000006  |
| 49 | 1  | 0 | 1.242885   | -5.111177 | 0.000004  |
| 50 | 1  | 0 | -1.242897  | -5.111174 | 0.000004  |
| 51 | 1  | 0 | -2.486465  | -3.005456 | 0.000005  |

-----

Optimized structure of **5TQ(H)** at UB3LYP/6-31G(d,p).

| Center<br>Number | Atomic<br>Number | Atomic<br>Type | Coordinates (Angstroms) |           |           |
|------------------|------------------|----------------|-------------------------|-----------|-----------|
|                  |                  |                | X                       | Y         | Z         |
| 1                | 16               | 0              | -1.020722               | 7.787329  | 0.000000  |
| 2                | 6                | 0              | 0.224939                | 6.521956  | 0.000000  |
| 3                | 6                | 0              | 1.517113                | 7.116466  | 0.000000  |
| 4                | 6                | 0              | 1.512953                | 8.486429  | 0.000000  |
| 5                | 6                | 0              | 0.201525                | 9.055058  | 0.000000  |
| 6                | 6                | 0              | -0.099704               | 5.171334  | 0.000000  |
| 7                | 6                | 0              | -1.394849               | 4.584215  | 0.000000  |
| 8                | 6                | 0              | -1.391849               | 3.210209  | 0.000000  |
| 9                | 6                | 0              | -0.099407               | 2.625935  | 0.000000  |
| 10               | 16               | 0              | 1.131886                | 3.898602  | 0.000000  |
| 11               | 6                | 0              | 0.232970                | 1.272359  | 0.000000  |
| 12               | 16               | 0              | -0.997644               | 0.000000  | -0.000000 |
| 13               | 6                | 0              | 0.232970                | -1.272359 | -0.000000 |
| 14               | 6                | 0              | 1.524974                | -0.687880 | -0.000000 |
| 15               | 6                | 0              | 1.524974                | 0.687880  | 0.000000  |
| 16               | 16               | 0              | 1.131885                | -3.898602 | -0.000000 |
| 17               | 6                | 0              | -0.099704               | -5.171333 | -0.000000 |
| 18               | 6                | 0              | -1.394850               | -4.584214 | -0.000000 |
| 19               | 6                | 0              | -1.391850               | -3.210208 | -0.000000 |
| 20               | 6                | 0              | -0.099408               | -2.625934 | -0.000000 |
| 21               | 6                | 0              | 0.224939                | -6.521956 | -0.000000 |

|    |    |   |           |            |           |
|----|----|---|-----------|------------|-----------|
| 22 | 6  | 0 | 1.517113  | -7.116466  | -0.000000 |
| 23 | 6  | 0 | 1.512954  | -8.486429  | -0.000000 |
| 24 | 6  | 0 | 0.201525  | -9.055059  | -0.000000 |
| 25 | 16 | 0 | -1.020722 | -7.787330  | -0.000000 |
| 26 | 6  | 0 | -0.121974 | -10.407974 | -0.000000 |
| 27 | 6  | 0 | -0.121974 | 10.407974  | 0.000000  |
| 28 | 6  | 0 | -1.474190 | 10.846078  | 0.000000  |
| 29 | 7  | 0 | -2.594302 | 11.170567  | 0.000000  |
| 30 | 6  | 0 | 0.911218  | 11.386628  | 0.000000  |
| 31 | 7  | 0 | 1.777500  | 12.166863  | 0.000000  |
| 32 | 6  | 0 | 0.911218  | -11.386628 | -0.000000 |
| 33 | 7  | 0 | 1.777502  | -12.166863 | -0.000000 |
| 34 | 6  | 0 | -1.474190 | -10.846079 | -0.000000 |
| 35 | 7  | 0 | -2.594302 | -11.170569 | -0.000000 |
| 36 | 1  | 0 | 2.423195  | 6.520446   | 0.000000  |
| 37 | 1  | 0 | 2.398557  | 9.109831   | 0.000000  |
| 38 | 1  | 0 | -2.297362 | 5.184392   | 0.000000  |
| 39 | 1  | 0 | -2.294323 | 2.609379   | 0.000000  |
| 40 | 1  | 0 | 2.427751  | -1.287959  | -0.000000 |
| 41 | 1  | 0 | 2.427752  | 1.287959   | 0.000000  |
| 42 | 1  | 0 | -2.297363 | -5.184391  | -0.000000 |
| 43 | 1  | 0 | -2.294324 | -2.609379  | -0.000000 |
| 44 | 1  | 0 | 2.423195  | -6.520446  | -0.000000 |
| 45 | 1  | 0 | 2.398558  | -9.109831  | -0.000000 |

---

## References

- 1) K. Yamamoto, S. Jinnai, T. Takehara, T. Suzuki, Y. Ie, *Org. Lett.*, 2020, **22**, 547–551.
- 2) Y. Shimizu, Z. Shen, S. Ito, H. Uno, J. Daub, N. Ono, *Tetrahedron Lett.*, 2002, **43**, 8485–8488.
- 3) K. Yamamoto, Y. Ie, M. Nitani, N. Tohnai, F. Kakiuchi, K. Zhang, W. Pisula, K. Asadi, P. W. M. Blom, Y. Aso, *J. Mater. Chem. C*, 2018, **6**, 7493–7500.

# <sup>1</sup>H NMR spectra

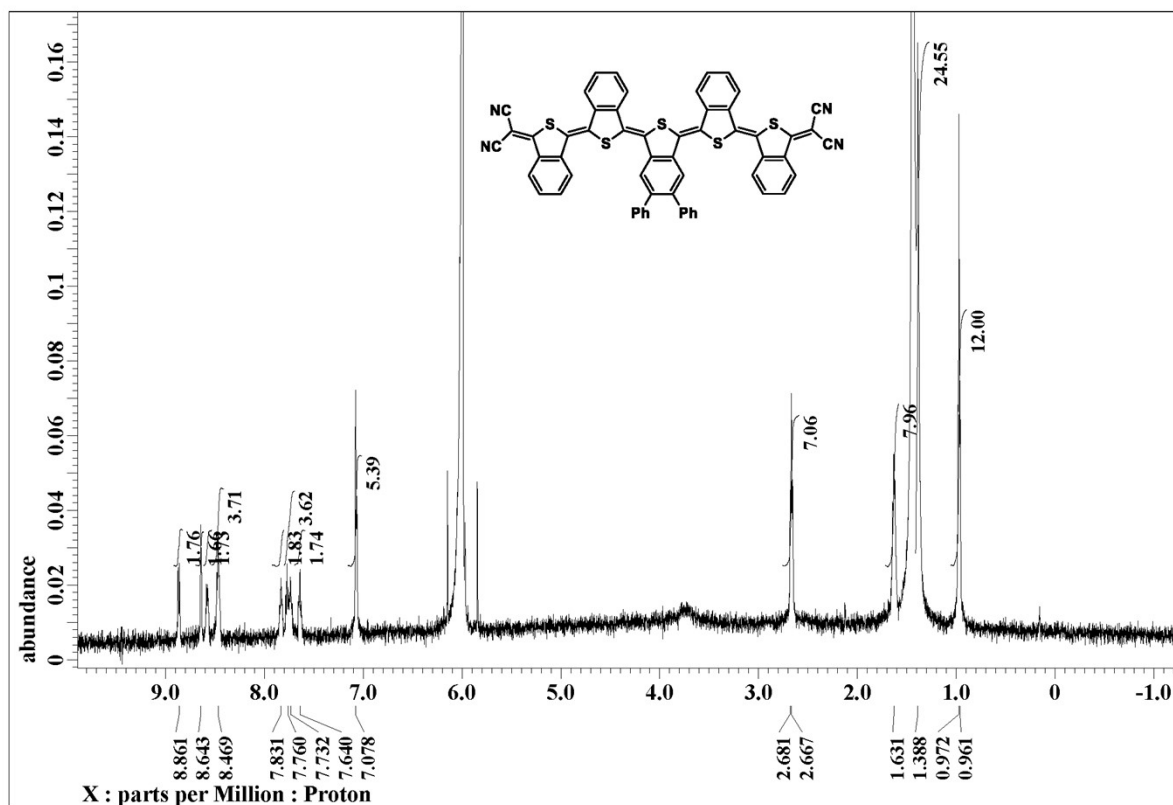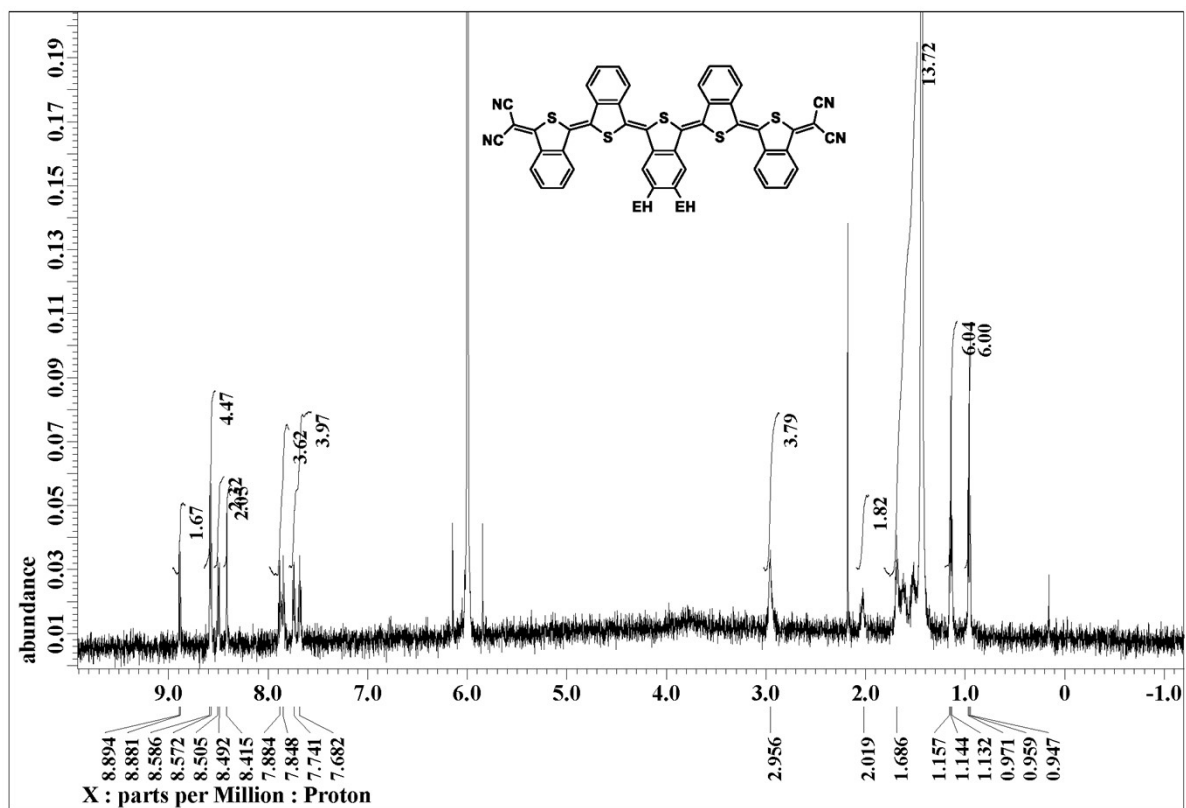

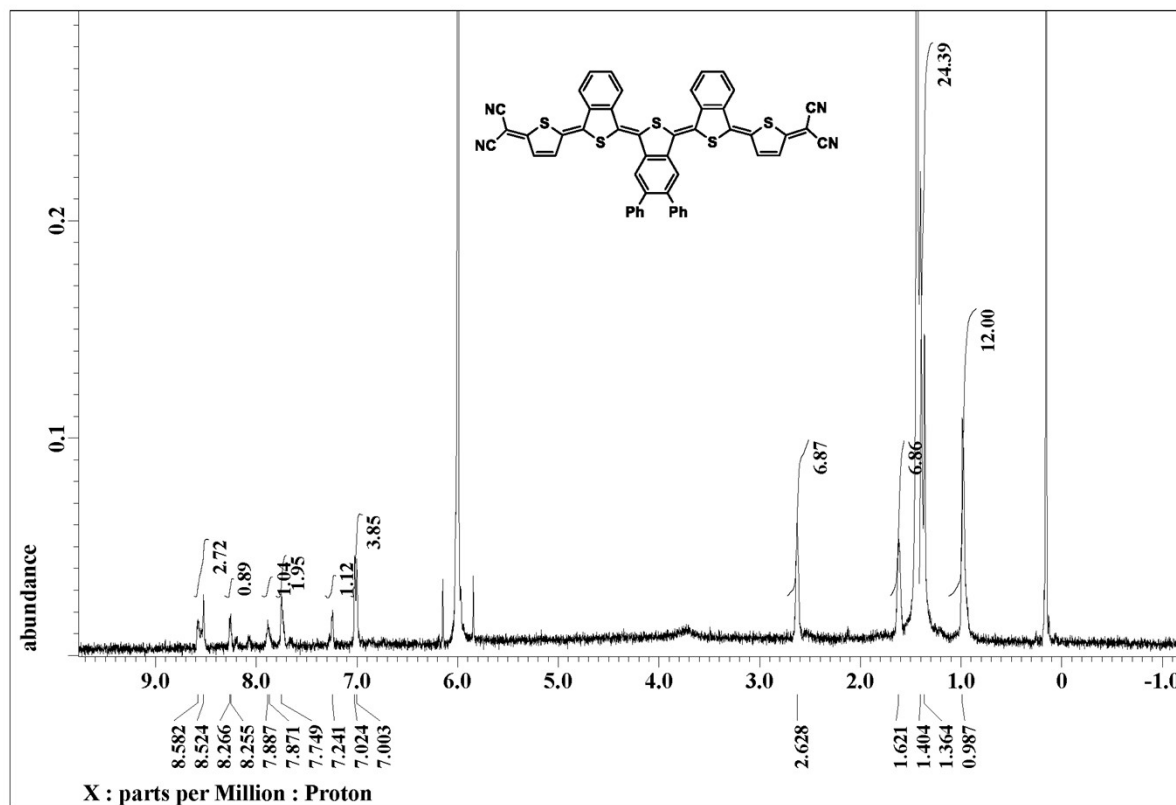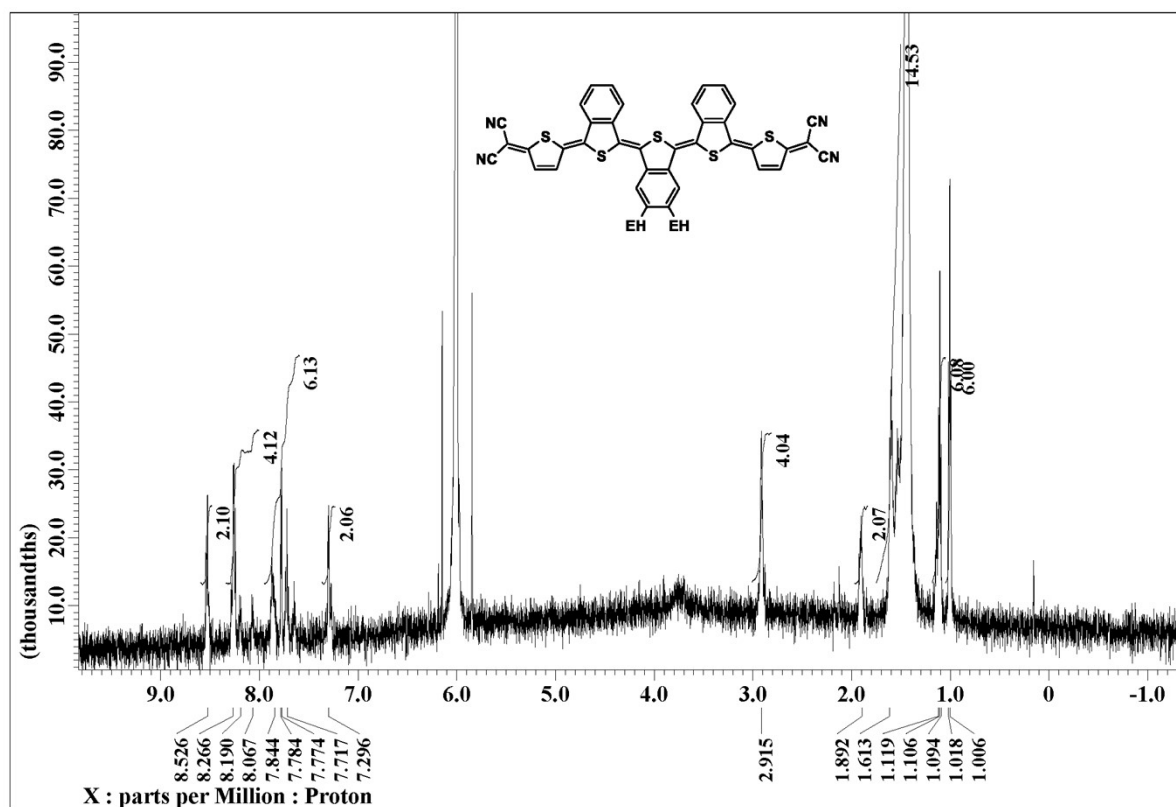



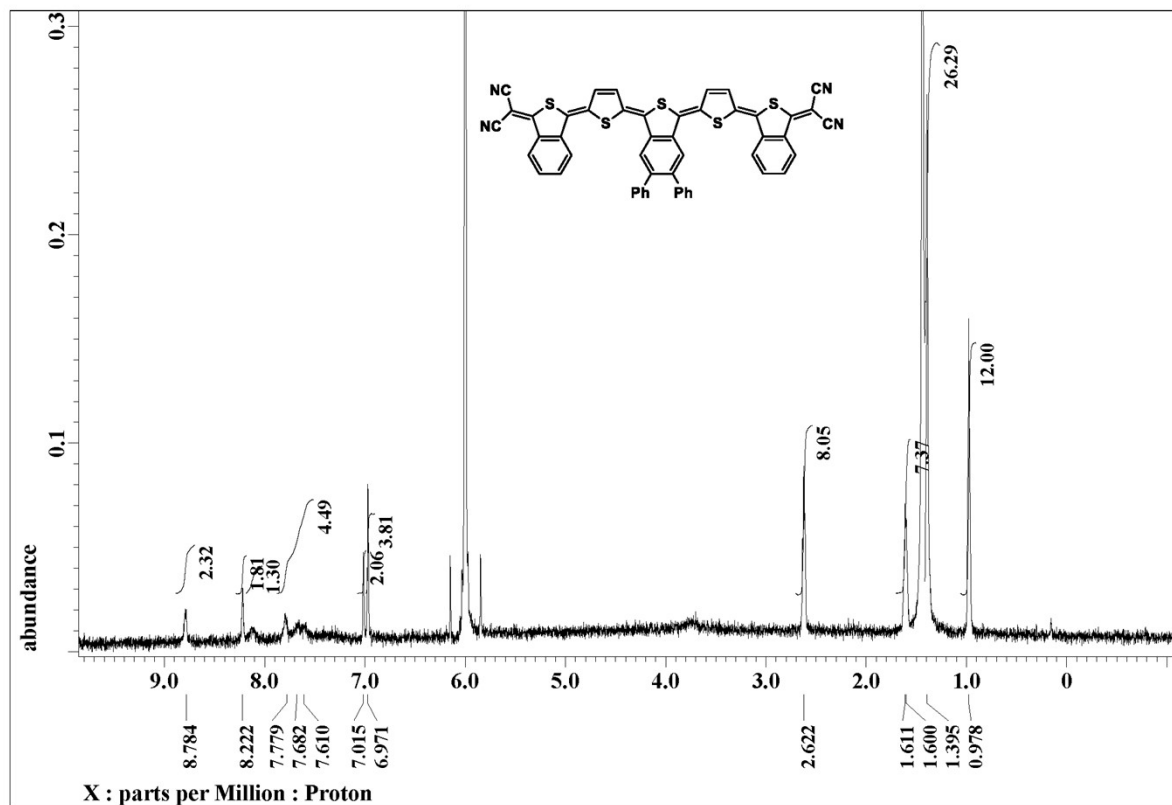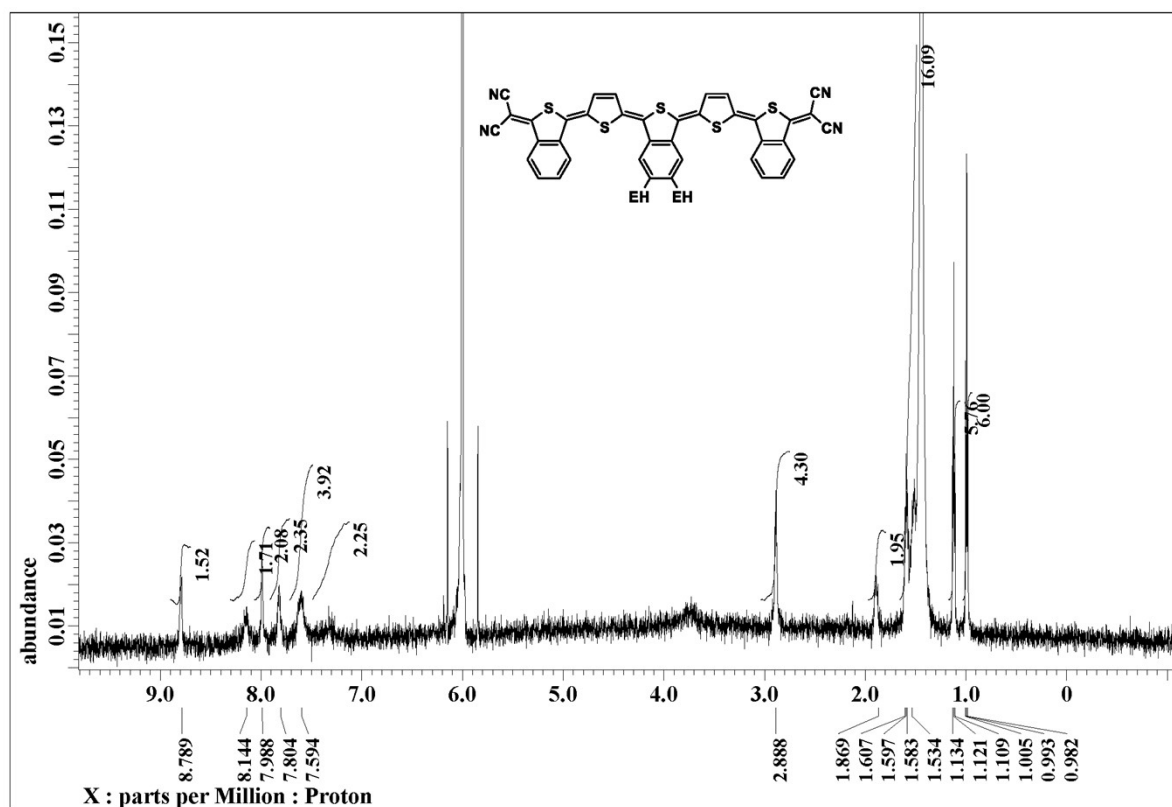

Supplement: d1tc05794d1.pdf [file d1tc05794d1.pdf]
